1 Genome-Wide Control of Population Structure and Relatedness in Genetic Association Studies  
2 via Linear Mixed Models with Orthogonally Partitioned Structure

3

4 Matthew P. Conomos<sup>1</sup>, Alex P. Reiner<sup>2,3</sup>, Mary Sara McPeck<sup>4,5</sup>, Timothy A. Thornton<sup>1,6</sup>

5

6 <sup>1</sup> Department of Biostatistics, University of Washington, Seattle, WA 98195, USA

7 <sup>2</sup> Department of Epidemiology, University of Washington, Seattle, WA 98195, USA

8 <sup>3</sup>Division of Public Health Sciences, Fred Hutchinson Cancer Research Center, Seattle, WA 98109,  
9 USA;

10 <sup>4</sup>Department of Statistics, University of Chicago, Chicago, IL 60637, USA

11 <sup>5</sup>Department of Human Genetics, University of Chicago, Chicago, IL 60637, USA

12 <sup>6</sup>Department of Statistics, University of Washington, Seattle, WA 98195, USA

13 Correspondence should be addressed to T.A.T ([tathornt@uw.edu](mailto:tathornt@uw.edu)) or M.P.C.

14 ([mconomos@uw.edu](mailto:mconomos@uw.edu)).

15

16

17

18

19

20

21

22

23

24

25

26 **Abstract**

27 Linear mixed models (LMMs) have become the standard approach for genetic association  
28 testing in the presence of sample structure. However, the performance of LMMs has primarily  
29 been evaluated in relatively homogeneous populations of European ancestry, despite many of  
30 the recent genetic association studies including samples from worldwide populations with  
31 diverse ancestries. In this paper, we demonstrate that existing LMM methods can have  
32 systematic miscalibration of association test statistics genome-wide in samples with  
33 heterogenous ancestry, resulting in both increased type-I error rates and a loss of power.  
34 Furthermore, we show that this miscalibration arises due to varying allele frequency differences  
35 across the genome among populations. To overcome this problem, we developed LMM-OPS, an  
36 LMM approach which orthogonally partitions diverse genetic structure into two components:  
37 distant population structure and recent genetic relatedness. In simulation studies with real and  
38 simulated genotype data, we demonstrate that LMM-OPS is appropriately calibrated in the  
39 presence of ancestry heterogeneity and outperforms existing LMM approaches, including  
40 EMMAX, GCTA, and GEMMA. We conduct a GWAS of white blood cell (WBC) count in an  
41 admixed sample of 3,551 Hispanic/Latino American women from the Women's Health Initiative  
42 SNP Health Association Resource where LMM-OPS detects genome-wide significant associations  
43 with corresponding p-values that are one or more orders of magnitude smaller than those from  
44 competing LMM methods. We also identify a genome-wide significant association with  
45 regulatory variant rs2814778 in the DARC gene on chromosome 1, which generalizes to  
46 Hispanic/Latino Americans a previous association with reduced WBC count identified in African  
47 Americans.

48

## 49 **Introduction**

50 The complete genealogy of individuals consists of recent genetic relatedness, such as pedigree  
51 relationships of family members, as well as more distant genetic relatedness, such as that due to  
52 population structure. In genetic association studies, it is well known that failure to appropriately  
53 account for either recent or distant genetic relatedness among sampled individuals can result in  
54 spurious association. To address this, linear mixed models (LMMs) have emerged as the  
55 standard approach for genetic association testing in samples with population structure, family  
56 structure, and/or cryptic relatedness<sup>1-10</sup>. Existing LMM implementations developed for GWAS  
57 model the entire genealogy of sampled individuals as a random effect, with the covariance  
58 structure of the phenotype specified by a single empirical genetic relationship matrix (GRM)<sup>11-13</sup>.  
59 This approach typically provides an acceptable genomic control inflation factor<sup>14</sup>, which is  
60 evaluated based on the median of the test statistics across all SNPs genome-wide. However, in  
61 the presence of population stratification, previous studies<sup>15,16</sup> have shown that there may be  
62 SNPs for which type-I error rates are not properly controlled, such as those SNPs with unusually  
63 large allele frequency differences between populations.

64 Here, we utilize SNP genotyping data from release 3 of phase III of the International  
65 Haplotype Map Project (HapMap)<sup>17</sup> to demonstrate that existing LMM approaches provide  
66 miscalibrated association test statistics when phenotypes are correlated with ancestry. This  
67 miscalibration arises due to variation across the genome in allele frequency differences between  
68 the populations from which the sampled individuals descend, and we show that it impacts all  
69 SNPs genome-wide, not only those with unusually large allele frequency differences. While  
70 standard LMM approaches appropriately control type-I error rates at SNPs with typical allele  
71 frequency differences, there is systematically inflated or deflated test statistics for SNPs with  
72 greater or smaller differences, respectively. Interestingly, we demonstrate that this pattern of

73 test statistic inflation/deflation can occur not only in samples with continental ancestry  
74 differences, but also in samples with subtle or fine-scale population structure. Furthermore, the  
75 miscalibration of test statistics is observed for LMM methods that estimate variance  
76 components once per genome screen, such as EMMAX<sup>3</sup> and GCTA<sup>13</sup>, as well as those that re-  
77 estimate variance components for every tested variant, such as GEMMA<sup>8</sup>.

78 To address the shortfalls of existing LMM methods, we propose a linear mixed model  
79 with orthogonally partitioned structure (LMM-OPS) method for genetic association testing of  
80 quantitative traits in samples with diverse ancestries. LMM-OPS appropriately accounts for  
81 variable population allele frequency differentiation across the genome to provide well-  
82 calibrated association test statistics at *all* SNPs genome-wide. With LMM-OPS, genetic sample  
83 structure is orthogonally partitioned into two separate components: a component for the  
84 sharing of alleles inherited identical by descent (IBD) from recent common ancestors, which  
85 represents familial relatedness, and another component for allele sharing due to more distant  
86 common ancestry, which represents population structure. LMM-OPS models population  
87 structure as a fixed effect by including vectors that are representative of genome-wide ancestry  
88 (e.g. principal components (PCs) or admixture proportions calculated from genome-wide data)  
89 as covariates, while recent genetic relatedness among individuals is modeled using a random  
90 effect, with covariance structure specified by an ancestry-adjusted empirical GRM. An important  
91 feature of the GRM used by LMM-OPS is that it is constructed to be orthogonal to the ancestry-  
92 representative vectors that are included as fixed effects. This ancestry-adjusted GRM measures  
93 the residual genetic covariance among sampled individuals, after adjusting for ancestry, as a  
94 way of capturing only recent genetic relatedness. As a result, the ancestry-adjusted GRM and  
95 the ancestry-representative vectors represent orthogonal information on sample structure, and

96 LMM-OPS avoids issues of double-fitting information in both the fixed and random effects,  
97 which could lead to over-correction of sample structure and a loss of power<sup>6,10</sup>.

98 We conduct simulation studies to demonstrate that LMM-OPS effectively accounts for  
99 complex sample genealogy, including population stratification, ancestry admixture, and familial  
100 relatedness, resulting in proper control of type-I error rates at all SNPs, as well as increased  
101 power over existing LMM methods for detecting genetic association. We also apply LMM-OPS  
102 and the LMM methods implemented in EMMAX<sup>3</sup>, GEMMA<sup>8</sup>, and GCTA<sup>13</sup> to a GWAS of white  
103 blood cell (WBC) count in a sample of 3,551 Hispanic American postmenopausal women from  
104 the Women's Health Initiative SNP Health Association Resource (WHI-SHARe) study<sup>18,19</sup>. The  
105 WHI-SHARe Hispanics have complex sample structure, including continental and sub-continental  
106 population structure as well as cryptic familial relatedness<sup>20</sup>. Consistent with our simulation  
107 study results, the LMM-OPS  $p$ -values for genome-wide significant SNPs are one or more orders  
108 of magnitude smaller than those from the competing LMM methods. Based on our analysis, we  
109 replicate<sup>21</sup> and generalize to Hispanic/Latino Americans a genome-wide significant association  
110 with regulatory variant rs2814778 in the Duffy Antigen Receptor for Chemokines (DARC) gene  
111 that was previously found to associate with lower WBC count in African Americans<sup>22,23</sup>.

112

## 113 **Materials and Methods**

### 114 **Standard Empirical GRM**

115 A genetic relationship matrix (GRM),  $\Psi$ , measures a weighted covariance of genotypes,  
116 averaged over all SNPs across the genome, between each pair of individuals. Consider a set  $\mathcal{N}$   
117 of sampled individuals that have been genotyped at a set  $\mathcal{S}$  of SNP genotype markers. A  
118 standard empirical estimator<sup>13</sup> of a GRM that is widely used scales the contribution of each SNP  
119 by the sample genotype variance under HWE and has  $[i, j]^{th}$  element

$$120 \quad \hat{\psi}_{ij} = \frac{1}{|\mathcal{S}|} \sum_{s \in \mathcal{S}} \frac{(x_{is} - 2\bar{p}_s)(x_{js} - 2\bar{p}_s)}{2\bar{p}_s(1 - \bar{p}_s)}, \quad (1)$$

121 where  $|\mathcal{S}|$  is the number of SNPs in the set  $\mathcal{S}$ ,  $x_{is}$  is the genotype value for individual  $i$  at

122 SNP  $s$ , and  $\bar{p}_s = \frac{1}{2} \hat{\mathbb{E}}[x_{is}] = \frac{1}{2|\mathcal{N}|} \sum_{i \in \mathcal{N}} x_{is}$  is the sample average allele frequency at SNP  $s$ , as

123  $|\mathcal{N}|$  is the number of sampled individuals. The genotype covariance structure captured by  $\hat{\Psi}$ ,

124 the empirical GRM constructed using the estimator  $\hat{\psi}_{ij}$  in Equation (1), includes contributions

125 from both distant population structure and recent familial relatedness<sup>24</sup>.

126

### 127 **Construction of an Empirical GRM Orthogonal to Genome-wide Ancestry**

128 Similar to the aforementioned standard GRM, an ancestry-adjusted GRM,  $\Phi$ , also measures a

129 weighted covariance of genotypes, averaged over all SNPs across the genome, between each

130 pair of individuals, however with the covariance is obtained conditional on the genome-wide

131 ancestries of the sampled individuals. Let  $\mathbf{V}$  be an  $|\mathcal{N}| \times (k+1)$  matrix whose column vectors

132 include an intercept and  $k$  ancestry-representative vectors (e.g. principal components (PCs) or

133 admixture proportions calculated from genome-wide data). One empirical estimator of an

134 ancestry-adjusted GRM has  $[i, j]^{th}$  element

$$135 \quad \tilde{\phi}_{ij} = \frac{1}{|\mathcal{S}|} \sum_{s \in \mathcal{S}} (x_{is} - 2\hat{\mu}_{is})(x_{js} - 2\hat{\mu}_{js}), \quad (2)$$

136 where  $\hat{\mu}_{is}$  is the  $i^{th}$  element of the vector  $\hat{\boldsymbol{\mu}}_s = \frac{1}{2} \hat{\mathbb{E}}[\mathbf{x}_s | \mathbf{V}] = \frac{1}{2} [\mathbf{V}(\mathbf{V}^T \mathbf{V})^{-1} \mathbf{V}^T \mathbf{x}_s]$  of fitted

137 values from a linear regression of  $\mathbf{x}_s$ , the genotype values for all individuals at SNP  $s$ , on  $\mathbf{V}$ .

138 To see that the ancestry-adjusted empirical GRM,  $\tilde{\Phi}$ , constructed using the estimator  $\tilde{\phi}_{ij}$  in

139 Equation (2) is orthogonal to genome-wide ancestry, let  $\mathbf{R}$  be an  $|\mathcal{N}| \times |\mathcal{S}|$  matrix whose  $s^{th}$   
 140 column vector is the residual vector from the linear regression of  $\mathbf{x}_s$  on  $\mathbf{V}$ ; i.e.  $(\mathbf{x}_s - 2\hat{\mu}_s)$ .  
 141 Because the residuals from a linear regression are orthogonal to the predictors,  $\mathbf{V}^T\mathbf{R} = \mathbf{0}$ , and  
 142 since the ancestry adjusted empirical GRM can be written as  $\tilde{\Phi} = \frac{1}{|\mathcal{S}|}\mathbf{R}\mathbf{R}^T$ , we have that  
 143  $\mathbf{V}^T\tilde{\Phi} = \frac{1}{|\mathcal{S}|}\mathbf{V}^T\mathbf{R}\mathbf{R}^T = \mathbf{0}\mathbf{R}^T = \mathbf{0}$ , indicating orthogonality of  $\mathbf{V}$  and  $\tilde{\Phi}$ . If  $\mathbf{V}$  fully captures the  
 144 population structure in the sample, then the genotype covariance structure represented by  $\tilde{\Phi}$   
 145 only includes that due to the sharing of alleles IBD from recent common ancestors; i.e. recent  
 146 familial relatedness<sup>24</sup>.

147 A potential limitation with  $\tilde{\Phi}$ , which we refer to as the ‘centered only’ ancestry-  
 148 adjusted empirical GRM, is that its elements have no meaningful biological interpretation  
 149 without scaling. To address this, an alternative ancestry-adjusted empirical GRM,  $\hat{\Phi}$ , can be  
 150 obtained using the PC-Relate method<sup>24</sup>, where the  $[i, j]^{th}$  element of this matrix is

$$151 \hat{\phi}_{ij} = \frac{\sum_{s \in \mathcal{S}} (x_{is} - 2\hat{\mu}_{is})(x_{js} - 2\hat{\mu}_{js})}{\sum_{s \in \mathcal{S}} [2\hat{\mu}_{is}(1 - \hat{\mu}_{is})]^{1/2} [2\hat{\mu}_{js}(1 - \hat{\mu}_{js})]^{1/2}}, \quad (3)$$

152 which is an estimator of twice the kinship coefficient for the pair of individuals  $i$  and  $j$ . We  
 153 refer to  $\hat{\Phi}$  as either the ‘PC-Relate’ or the ‘centered and standardized’ ancestry-adjusted  
 154 empirical GRM. While  $\hat{\Phi}$  has improved biological interpretability over  $\tilde{\Phi}$ , it is no longer  
 155 strictly orthogonal to the ancestry-representative vectors  $\mathbf{V}$  because the scaling factor in the  
 156 denominator of Equation (3) depends on  $i$  and  $j$ . However, in practice we have found that the  
 157 scaling factors for each pair of individuals are generally similar, as they are computed as an

158 average across all SNPs in  $\mathcal{S}$ , and the elements of  $\hat{\Phi}$  and  $\tilde{\Phi}$  are very highly correlated (see  
 159 Results), indicating that  $\hat{\Phi}$  is approximately orthogonal to  $V$ .

160

### 161 Linear Mixed Models for GWAS

162 A standard linear mixed model (LMM) used in GWAS to test for genetic association at SNP

163  $s' \in \mathcal{S}$  can be written as

$$\begin{aligned}
 \mathbf{Y} &= W\alpha + \mathbf{x}_{s'}\beta_{s'} + \mathbf{g} + \epsilon \\
 \mathbf{g} &\sim N(\mathbf{0}, \sigma_A^2 \Psi) \\
 \epsilon &\sim N(\mathbf{0}, \sigma_\epsilon^2 \mathbf{I}_{|\mathcal{N}|})
 \end{aligned}
 \tag{4}$$

165 where  $\mathbf{Y}$  is a vector of phenotype values for all individuals,  $W$  is a matrix of covariates  
 166 including an intercept,  $\alpha$  is a corresponding vector of effect sizes,  $\mathbf{x}_{s'}$  is the vector of genotype  
 167 values for all individuals at SNP  $s'$ ,  $\beta_{s'}$  is the effect size of SNP  $s'$ ,  $\mathbf{g}$  is a random effect that  
 168 captures the polygenic effect of other SNPs,  $\sigma_A^2$  is a parameter that measures the additive  
 169 genetic variance of the phenotype,  $\Psi$  is the standard genetic relationship matrix (GRM)<sup>25</sup>,  $\epsilon$  is  
 170 a random effect that captures independent residual effects,  $\sigma_\epsilon^2$  is a parameter that measures  
 171 residual variance, and  $\mathbf{I}_{|\mathcal{N}|}$  is an identity matrix. Generalized least squares (GLS) can be used to  
 172 fit the LMM in Equation (4) and test the null hypothesis that  $\beta_{s'} = 0$ ; however, the overall  
 173 covariance structure of the phenotype,  $\text{Cov}[\mathbf{Y}] \equiv \sigma_A^2 \Psi + \sigma_\epsilon^2 \mathbf{I}_{|\mathcal{N}|}$ , is unknown in practice and  
 174 must first be estimated. In order to do so, an empirical GRM, such as  $\hat{\Psi}$  with  $[i, j]^{\text{th}}$  element  
 175 given by Equation (1), is estimated from the available SNP data. Utilizing this empirical GRM in  
 176 the null model (i.e. the model with  $\beta_{s'}$  fixed at 0), estimates of the variance components  $\hat{\sigma}_A^2$



177 and  $\hat{\sigma}_\epsilon^2$  are obtained, typically with restricted maximum likelihood (REML). GLS can then be  
 178 performed using the estimate of the overall phenotypic covariance structure,

$$179 \quad \widehat{\text{Cov}}[\mathbf{Y}] = \hat{\sigma}_A^2 \hat{\Psi} + \hat{\sigma}_\epsilon^2 \mathbf{I}_{|\mathcal{N}|}.$$

180

### 181 **The LMM-OPS Model**

182 The LMM-OPS model that we propose has a similar form to the LMM presented in Equation (4),  
 183 but with the genealogical structure of the sample orthogonally partitioned into fixed and  
 184 random effects. Population structure is adjusted for as a fixed effect, and recent genetic  
 185 relatedness is accounted for as a random effect. The LMM-OPS model can be written as

$$186 \quad \begin{aligned} \mathbf{Y} &= \mathbf{W}\alpha + \mathbf{V}\gamma + \mathbf{x}_s \beta_{s'} + \mathbf{g} + \epsilon \\ \mathbf{g} &\sim \mathbf{N}(\mathbf{0}, \sigma_A^2 \Phi) \\ \epsilon &\sim \mathbf{N}(\mathbf{0}, \sigma_\epsilon^2 \mathbf{I}_{|\mathcal{N}|}) \end{aligned} \quad (5)$$

187 The differences in the LMM-OPS model in Equation (5) from the standard LMM model in  
 188 Equation (4) are that it includes  $\mathbf{V}$ , the matrix of ancestry-representative vectors with  
 189 corresponding effect sizes  $\gamma$ , in the mean model to adjust for population structure, and it uses  
 190 an ancestry-adjusted GRM,  $\Phi$ , that only measures recent familial relatedness, in place of the  
 191 standard GRM,  $\Psi$ . Therefore, with population structure modeled as a fixed effect in the mean,  
 192 the overall covariance structure of the phenotype in LMM-OPS model is given by

$$193 \quad \text{Cov}[\mathbf{Y}] \equiv \sigma_A^2 \Phi + \sigma_\epsilon^2 \mathbf{I}_{|\mathcal{N}|}.$$

194 As with the standard LMM in the previous section, GLS can be used to

195 fit the LMM-OPS model and test for genetic association. The procedure is identical, except that  
 $\hat{\sigma}_A^2$ ,  $\hat{\sigma}_\epsilon^2$ , and  $\widehat{\text{Cov}}[\mathbf{Y}]$  are obtained utilizing an ancestry-adjusted empirical GRM estimated

196 from the available SNP data. Either the ‘centered only’ ancestry-adjusted empirical GRM,  $\tilde{\Phi}$ ,

197 with  $[i, j]^{th}$  element given by Equation (2), or the ‘centered and standardized’ ancestry-adjusted  
198 empirical GRM,  $\hat{\Phi}$ , with  $[i, j]^{th}$  element given by Equation (3), can be used for LMM-OPS.  
199 Throughout the remainder of this manuscript, unless specified otherwise, we use the centered  
200 and standardized ancestry-adjusted empirical GRM when presenting LMM-OPS results.

201

## 202 **Simulation Studies**

203 In all simulation studies, association testing was performed using LMM-OPS, EMMAX, GCTA,  
204 GEMMA, and linear regression adjusted for PCs. LMM-OPS included the top PC from PC-AiR<sup>26</sup> as  
205 a fixed effect to adjust for ancestry in the mean model, and it used an ancestry-adjusted  
206 empirical GRM constructed with PC-Relate<sup>24</sup> to account for correlation among genotypes due to  
207 recent genetic relatedness. All analyses with EMMAX, GCTA and GEMMA used the default  
208 genetic relationship matrices implemented in their respective software to account for sample  
209 structure. Details are provided in Appendix A. Throughout the simulation studies, EMMAX and  
210 GCTA gave nearly identical results; therefore, only those from EMMAX are presented. Linear  
211 regression adjusted for PCs used the top PC from PC-AiR, rather than EIGENSTRAT<sup>27</sup>, to ensure  
212 that ancestry was accurately captured and not confounded by pedigree structure<sup>26</sup>.

213         Simulation studies were used to investigate the impact of variation across the genome  
214 in allele frequency differences between populations on association test statistics at null SNPs.  
215 Two simulation studies were conducted using samples from two different pairs of HapMap  
216 populations: (1) the closely related CEU (Utah residents with Northern and Western European  
217 ancestry from the CEPH collection;  $n = 165$ ) and TSI (Toscans in Italy;  $n = 88$ ) populations, which  
218 are both European, and (2) the highly divergent CEU and YRI (Yoruba in Ibadan, Nigeria;  $n = 172$ )  
219 populations, which are inter-continental. For each study, we simulated 1,000 replicates of a  
220 heritable quantitative phenotype with a mean shift due to an individual’s population

221 membership. To make each replicate of the phenotype 10% heritable, 100 SNPs from  
222 chromosome 1 were randomly selected to be causal, each with an effect size chosen based on  
223 allele frequency to account for 0.1% of the total phenotypic variability. The effects due to  
224 population membership accounted for 18% of the phenotypic variability on average across  
225 phenotype replicates in both studies. For each phenotype replicate, the SNPs on chromosomes  
226 2-22, which had no direct causal link to the phenotype, were tested for association. Despite not  
227 being causal, SNPs on these chromosomes could be indirectly correlated with the phenotype if  
228 they had different allele frequencies in the two populations, resulting in inflated type-I error  
229 rates if population stratification was not adequately accounted for.

230 Additional simulation studies were also carried out to assess the performance of the  
231 association testing methods in the presence of ancestry admixture. We simulated genotypes for  
232 three separate samples, each with two-way ancestry admixture, but each with a different choice  
233 of  $F_{ST}$ <sup>28</sup> (0.01, 0.05, and 0.15) for the underlying populations. An  $F_{ST}$  of 0.01 is a typical value  
234 between European populations, such as the CEU and TSI, while  $F_{ST} = 0.15$  is representative of  
235 divergent inter-continental populations, similar to what has previously been estimated between  
236 the CEU and YRI populations<sup>29,30</sup>. To generate data sets under each choice of  $F_{ST}$ , allele  
237 frequencies for the two underlying populations were generated for 200,000 independent SNPs  
238 using the Balding-Nichols model<sup>31</sup>, and genotype data at these SNPs were simulated for 3,000  
239 individuals with admixed ancestry derived from the two populations. These SNPs were then  
240 split into two disjoint sets of 100,000, which we refer to as Set 1 and Set 2. Each sample  
241 included 2,160 unrelated individuals, 120 cousin pairs, and 30 four-generation, twenty-person  
242 pedigrees (Figure S1). Individual ancestry proportions for unrelated individuals and pedigree  
243 founders were randomly drawn from various beta distributions, and ancestry proportions for  
244 pedigree descendants were calculated as the average of their parents'. For each of the three

245 admixed samples, we simulated 1,000 replicates of a quantitative phenotype with 10%  
246 heritability and with a mean shift due to an individual's genome-wide ancestry that accounted  
247 for 17% of the phenotypic variability on average. Causal SNPs for generating each phenotype  
248 replicate were randomly selected from Set 2. The 100,000 SNPs in Set 1, which had no direct  
249 causal link to the phenotype but could be indirectly correlated with it if they were associated  
250 with genome-wide ancestry, were tested for association. For each association testing method,  
251 sample genealogical structure was inferred using the SNPs in Set 1.

252 Finally, we performed simulation studies in the admixed setting with  $F_{ST} = 0.15$  to assess  
253 the power of each of the association testing methods to detect causal SNPs. Phenotypes were  
254 simulated exactly as for the null SNP studies, but with an additional main effect due to a single  
255 causal SNP of interest,  $s'$ , randomly selected from Set 2. The effect size for this causal SNP was  
256 chosen based on allele frequency to account for a pre-specified percentage ( $h_{s'}^2 = 0.75\%$ ,  $1.00\%$ ,  
257  $1.25\%$ , or  $1.50\%$ ) of the total phenotypic variability. For each choice of  $h_{s'}^2$ , a total of 10,000  
258 phenotype-SNP pair replicates were generated and tested for association. Additional details on  
259 how phenotypes and genotypes were generated for all simulations are provided in Appendix B.

260

### 261 **GWAS of WBC Count in WHI Hispanics.**

262 The Women's Health Initiative (WHI) is a long-term national health study focused on identifying  
263 risk factors for common diseases in postmenopausal women. A total of 161,838 women aged  
264 50–79 years were recruited from 40 clinical centers in the United States between 1993 and  
265 1998. Detailed cohort characteristics and recruitment methods have been described  
266 previously<sup>18,19</sup>. Approximately 17% of participants in this study are under-represented U.S.  
267 minority women, and the WHI SNP Health Association Research (WHI-SHARe) minority cohort

268 includes 3,587 self-reported Hispanics who provided consent for DNA analysis. Affymetrix 6.0  
269 genotyping and quality control filtering of these Hispanic-American samples was performed as  
270 described previously<sup>32</sup>. Total circulating white blood cell (WBC) count was measured on a fresh  
271 blood sample at local clinical laboratories using automated hematology cell counters and  
272 standardized quality assurance procedures. Total WBC count was reported in millions of cells  
273 per ml, and was log transformed prior to analysis to reduce skewness in the distributions of the  
274 phenotypic data. A GWAS of the log-transformed WBC counts measured on women in the WHI-  
275 SHARe Hispanic cohort was performed using LMM-OPS, EMMAX, GCTA, and GEMMA. For the  
276 LMM-OPS analysis, the first 6 PCs generated with PC-AiR were included as fixed effects to adjust  
277 for population stratification, and an ancestry-adjusted empirical GRM calculated conditionally  
278 on these PCs with PC-Relate was used to account for recent familial relatedness. The other  
279 LMM methods were run with their default settings, filters, and relationship matrices. A total of  
280 616,556 autosomal SNPs were tested for association in the GWAS. Further details are provided  
281 in Appendix A.

282

## 283 **Results**

### 284 **Impact of Variable Allele Frequency Differences on Association Test Statistics**

285 Using the two HapMap based simulation studies, we compared the test statistics obtained from  
286 each association testing method for null SNPs. Penalized cubic regression splines were used to  
287 find smoothed curves showing the relationship between the absolute value of the allele  
288 frequency difference between the pair of populations at SNP  $s$ , denoted  $D_s$ , and the mean of the  
289 test statistics from each method (Figure 1). Test statistics should follow a  $\chi^2_{(1)}$  distribution at  
290 null SNPs, so the mean of the test statistics for a well-calibrated method should be 1, regardless  
291 of allele frequency differences between the two populations. However, in both HapMap

292 studies, the mean of the test statistics from EMMAX and GEMMA increased with increasing  
293 values of  $D_s$ . Test statistics from these methods were substantially inflated (i.e. under-  
294 corrected) at SNPs with the largest values of  $D_s$  and deflated (i.e. over-corrected) at SNPs with  
295 the smallest values of  $D_s$ . In contrast, the mean of the test statistics from both LMM-OPS and  
296 linear regression adjusted for the top PC from PC-AiR showed no relationship with the value of  
297  $D_s$ . This indicates that including the ancestry-representative PC as a fixed effect in the mean  
298 model effectively accounted for the variable allele frequency differences across SNPs. However,  
299 since linear regression adjusted for the top PC from PC-AiR did not account for the correlation of  
300 phenotypes among relatives, its test statistics were equally inflated across all values of  $D_s$  (1.027  
301 on average for the CEU/TSI sample, and 1.032 on average for the CEU/YRI sample). In both  
302 studies, LMM-OPS was the only method that provided well-calibrated test statistics for all null  
303 SNPs, with the mean of the test statistics near 1 for all values of  $D_s$ .

304 Comparing the results from EMMAX and GEMMA for the joint CEU/YRI sample (Figures  
305 1A and 1B) to those for the joint CEU/TSI sample (Figures 1C and 1D), it is apparent that the  
306 particular values of  $D_s$  for which the mean of the test statistics are either inflated or deflated  
307 depends on the pair of populations being analyzed. To further understand this relationship, we  
308 investigated the distribution of allele frequency differences across the genome for different  
309 pairs of populations by estimating population specific allele frequencies at 1,423,833 autosomal  
310 SNPs in the consensus data set for six HapMap populations: the previously mentioned CEU, TSI,  
311 and YRI populations, as well as the LWK (Luhya in Webuye, Kenya;  $n = 90$ ), CHB (Han Chinese in  
312 Beijing, China ;  $n = 137$ ), and JPT (Japanese in Tokyo, Japan;  $n = 86$ ) populations. For each pair of  
313 these populations, select quantiles (Table S1) of  $D_s$  and its cumulative distribution function  
314 across all autosomal SNPs (Figure S2) were calculated. As expected, the distribution of  $D_s$  is  
315 more concentrated at smaller values for pairs of populations from the same continent (i.e.

316 CEU/TSI, CHB/JPT, and LWK/YRI) as compared to pairs of populations from different continents.  
317 Over 90% of SNPs have  $D_s < 0.1$  for the three intra-continental pairs of populations, while at  
318 least 49.8% of SNPs have  $D_s \geq 0.1$  for each of the inter-continental pairs. When SNP  $s$  has a large  
319 (small)  $D_s$  value relative to the other SNPs used to construct the GRM, both EMMAX and  
320 GEMMA provide an inflated (deflated) test statistic for SNP  $s$  on average. Therefore, as a  
321 consequence of the different distributions of  $D_s$ , inflation of EMMAX and GEMMA test statistics  
322 is observed at smaller absolute values of  $D_s$  when jointly analyzing more closely related  
323 populations, such as the CEU and TSI, compared to more divergent populations, such as the CEU  
324 and YRI.

325

### 326 **Performance at Null SNPs in Admixed Populations**

327 We also compared the test statistics obtained from each association testing method for null  
328 SNPs in the simulated admixed populations. Penalized cubic regression splines showing the  
329 relationship between the local mean of the test statistics from each method and  $D_s$  showed the  
330 same patterns as those from the HapMap simulations (Figures 2A-2C). Specifically, LMM-OPS  
331 was the only method that provided well-calibrated test statistics for all  $D_s$ , test statistics from  
332 linear regression adjusted for the top PC from PC-AiR were uniformly inflated for all values of  $D_s$ ,  
333 and EMMAX and GEMMA provided test statistics that were inflated at SNPs with the largest  
334 values of  $D_s$  and deflated at SNPs with the smallest values of  $D_s$ . The distribution of  $D_s$  values  
335 depended on the  $F_{ST}$  for the pair of populations contributing to the admixed sample (Figure 2D).  
336 However, as demonstrated with the HapMap data, the qualitative patterns of test statistic  
337 inflation and deflation for each method were the same across all choices of  $F_{ST}$ , regardless of the  
338 range of  $D_s$ .

339           To further examine the performance of each method for null SNPs in the simulation  
340 study with  $F_{ST} = 0.15$ , we defined three classes of SNPs based on the magnitude of their allele  
341 frequency difference. SNPs were classified as weakly, moderately, or highly differentiated if they  
342 were in the first ( $D_s < 0.07$ ), second/third ( $0.07 < D_s < 0.28$ ), or fourth ( $D_s > 0.28$ ) quartile of the  
343 distribution of the magnitude of allele frequency differences, respectively. Genomic inflation  
344 factors,  $\lambda_{GC}$ , were calculated genome-wide, as well as in each of these three classes of SNPs, for  
345 each of the 1,000 simulation replicates (Table 1). The genomic inflation factor is commonly used  
346 in genetic association studies to evaluate confounding due to unaccounted for sample structure,  
347 where  $\lambda_{GC} \approx 1$  suggests appropriate correction, while  $\lambda_{GC} > 1$  indicates an elevated type-I error  
348 rate. LMM-OPS was the only method that obtained  $\lambda_{GC}$  values near 1 genome-wide as well as  
349 within all three classes of SNPs. For linear regression adjusted for the top PC from PC-AiR, the  
350 average genomic inflation factor was nearly the same ( $\lambda_{GC} \approx 1.026$ ) genome-wide and within all  
351 three classes of SNPs. Interestingly, both EMMAX and GEMMA obtained  $\lambda_{GC}$  values near 1  
352 when calculated from the median of the test statistics for all SNPs genome-wide, but obtained  
353  $\lambda_{GC}$  values that were greater than 1 for highly differentiated SNPs and less than 1 for weakly  
354 differentiated SNPs.

355           Additionally, modified QQ plots were generated for each LMM method using the  $p$ -  
356 values for all 100,000,000 null SNPs pooled across the 1,000 phenotype replicates, as well as for  
357 the subsets of these SNPs that were highly, moderately, or weakly differentiated (Figure 3). As  
358 with the genomic-inflation factors, the QQ plots indicate that LMM-OPS is well calibrated  
359 genome-wide as well as in all three classes of SNPs. In contrast, EMMAX and GEMMA appear  
360 well calibrated when examining all SNPs genome-wide, but show deviation in the observed  $p$ -  
361 values from those expected under the null when examining each of the three classes of SNPs  
362 separately.



### 363 **Detection of Causal SNPs**

364 We also performed simulation studies in the setting with  $F_{ST} = 0.15$  to assess the power of each  
365 of the LMM methods. Linear regression with PCs was omitted from these comparisons because  
366 it had consistent inflation of type-I error rates across all SNPs. Power to detect causal SNPs with  
367  $h_s^2 = 0.75\%$ ,  $1.00\%$ ,  $1.25\%$ , and  $1.50\%$  was computed at the genome-wide significance level  $\alpha =$   
368  $5 \times 10^{-8}$  across all SNPs, as well as within the highly, moderately, and weakly differentiated  
369 classes. When considering all causal SNPs, LMM-OPS had significantly higher power than  
370 EMMAX and GEMMA by about 2-3% for each choice of  $h_s^2$ , (Figure 4 and Table S2). This  
371 difference in power corresponded with LMM-OPS detecting between 2% and 10% more causal  
372 SNPs than the other LMM methods. Furthermore, LMM-OPS provided the highest power to  
373 detect causal SNPs within each class of allele frequency differentiation. Perhaps surprisingly, this  
374 included highly differentiated SNPs, for which EMMAX and GEMMA provide systematically  
375 inflated test statistics at null SNPs and have inflated type-I error rates.

376

### 377 **GWAS of WBC Count in the WHI SHARe Hispanic Cohort**

378 LMM-OPS, EMMAX, GCTA, and GEMMA all obtained satisfactory genome-wide genomic  
379 inflation  $\lambda_{GC}$  values (Table S3), but the QQ-plots of the  $-\log_{10}(p\text{-values})$  from each method  
380 appeared to show some early deviation from expectation (Figure 5A). The only SNPs  
381 approaching genome-wide significance were on chromosome 1, so we recalculated  $\lambda_{GC}$  and  
382 generated new QQ-plots with chromosome 1 excluded to investigate this deviation. The QQ-  
383 plots excluding SNPs from chromosome 1 appeared well behaved for all four methods (Figure  
384 5B), indicating that the early deviation in the genome-wide QQ-plots was due to a large number  
385 of associated SNPs on chromosome 1. The corresponding  $\lambda_{GC}$  values were 1.005, 0.993, 0.993,  
386 and 0.994 for LMM-OPS, EMMAX, GCTA, and GEMMA, respectively. We also conducted a GWAS

387 using standard linear regression including the top 6 PCs from PC-AiR as fixed effects. As  
388 expected, the test statistics were inflated, giving  $\lambda_{GC} = 1.045$  when excluding chromosome 1.  
389 This inflation was most likely due to unaccounted for familial relatedness in the sample<sup>20,24</sup>.

390 The genotype effect size estimates from all four LMM methods were similar on average,  
391 however LMM-OPS consistently provided the smallest standard error estimates, and thus a  
392 more efficient association test (Figure S3). The Manhattan plot of the LMM-OPS  $-\log_{10}(p\text{-values})$   
393 shows a strong association signal for WBC count in a region on chromosome 1 (Figure 5C).  
394 LMM-OPS attained the highest significance in this region, and all genome-wide significant  $p$ -  
395 values with LMM-OPS were one or more orders of magnitude smaller than those from the  
396 competing LMM methods (Figure 5D and Table 2). The most significant SNP on chromosome 1  
397 was rs11265198 (LMM-OPS  $p = 6.49 \times 10^{-13}$ ; EMMAX  $p = 2.49 \times 10^{-10}$ ; GCTA  $p = 2.77 \times 10^{-10}$ ;  
398 GEMMA  $p = 4.00 \times 10^{-11}$ ). In addition, there was one SNP in this region, rs6656586, which  
399 attained genome-wide significance with LMM-OPS but did not with any of the other methods.

400 The most significant SNP, rs11265198, is near the Duffy Antigen Receptor for  
401 Chemokines (DARC) gene. An African derived regulatory variant in DARC, rs2814778, was  
402 previously found to associate with lower WBC count in African Americans<sup>22,23</sup>. Genotype  
403 dosages for rs2814778 were imputed using MaCH-Admix<sup>32</sup> in the WHI-SHARe Hispanics and  
404 tested for association using LMM-OPS. The  $p$ -value for rs2814778 was  $1.89 \times 10^{-18}$ , providing a  
405 stronger signal than any of the directly genotyped SNPs tested for association with WBC count.  
406 Additionally, we re-ran a GWAS with LMM-OPS conditional on rs2814778, and all of the  
407 previously identified genome-wide significant SNPs on chromosome 1 became non-significant  
408 (Figure S4), indicating that these SNPs were tagging this regulatory variant. Thus, we were able  
409 replicate and generalize<sup>21</sup> to Hispanics/Latinos the previously identified association in African  
410 Americans for WBC count and this regulatory variant in the DARC gene.

411

412

### 413 **Importance of Orthogonality**

414 The key feature of LMM-OPS that differentiates it from existing LMM methods for GWAS is the  
415 partitioning of sample structure into separate orthogonal components due to recent and distant  
416 genetic relatedness. For each of the LMM-OPS analyses presented here, the PC-Relate kinship  
417 coefficient matrix, which is calculated conditionally on PCs, was used as the ancestry-adjusted  
418 GRM to account for recent genetic relatedness. However, this matrix is actually only  
419 approximately orthogonal to the PCs used to account for distant genetic relatedness (see  
420 Methods). In order to construct a strictly orthogonal matrix, one could compute an ancestry-  
421 adjusted GRM from genotype values that are centered conditional on PCs, without any scaling.  
422 Nevertheless, we consistently find that the entries in either of these ancestry-adjusted GRMs  
423 are very highly correlated across all pairs of individuals, and the resulting LMM-OPS association  
424 test statistics and  $p$ -values are nearly identical when using either matrix (Figures S5 – S7 and  
425 Table 2). Due to this observation, we typically recommend using the PC-Relate kinship  
426 coefficient matrix in practice, as it has the advantage of biological interpretability of the matrix  
427 elements as kinship coefficient estimates.

428 To further explore the impact of using an empirical GRM that is orthogonal to the PCs  
429 included in the analysis as fixed effect covariates, we re-ran the EMMAX, GCTA, and GEMMA  
430 analyses of WBC count, but included the same 6 PCs that were used in the LMM-OPS analysis as  
431 fixed effect covariates, which corresponds to an approach that was previously proposed for  
432 associating testing in structured samples with unusually differentiated SNPs<sup>15,26</sup>. In these  
433 analyses, the PCs and the GRM were both adjusting for the population structure. The results  
434 from these models were very similar to those from the corresponding models without PCs

435 (Figure S8 and Table 2). These results demonstrate that the efficiency gain achieved with LMM-  
436 OPS cannot be replicated by simply including ancestry representative PCs in an LMM with a  
437 standard empirical GRM. Partitioning sample structure due to population stratification and  
438 recent genetic relatedness into separate, orthogonal components, as is done with LMM-OPS, is  
439 essential for improved efficiency in association testing.

440

#### 441 **Computation Time**

442 We compared the computation time required by LMM-OPS, EMMAX, GEMMA (v0.94), and GCTA  
443 (v1.24.7) to perform the association analysis of WBC count at all 616,556 autosomal SNPs for  
444 the 3,551 women in the WHI-SHARe sample. The computation times required to construct the  
445 relationship matrices were not included in this assessment since all of the LMM methods can  
446 use a pre-computed GRM, and each GRM has similar computational complexity<sup>10</sup>. Each method  
447 was run using a single core 2.4 GHz Intel Xeon E5-2630L processor with 128 GB of RAM. LMM-  
448 OPS is implemented in R, and was run using R v3.2.0 configured to use the BLAS and LAPACK  
449 libraries within the Intel Math Kernel Library (MKL). LMM-OPS was substantially faster than the  
450 other methods, which took at least twice as long, and up to over seven times as long to perform  
451 the analysis. The computation time for LMM-OPS to complete the analysis was 20.4 minutes  
452 (0.34 hours). In comparison, the computation time for GCTA was 44.6 minutes (0.74 hours), for  
453 GEMMA was 1.84 hours, and for EMMAX was 2.43 hours.

454

#### 455 **Discussion**

456 Genetic association studies involving ancestrally diverse populations from around the world  
457 have recently become more common as there is increased interest in both identifying novel,  
458 population specific variants that underlie phenotypic diversity and generalizing associations

459 across populations. Confounding due to ancestry is a serious concern for genetic association  
460 studies since different ethnic groups often share distinct dietary habits and other lifestyle  
461 characteristics that lead to many traits of interest being correlated with ancestry. Linear mixed  
462 models (LMMs) have become the go-to approach for genome-wide association testing of  
463 quantitative traits, as they are both computationally fast and statistically powerful<sup>10</sup>.  
464 Furthermore, it has been reported that LMMs are effective at controlling type I error rates in  
465 samples with relatedness and population structure, as they tend to provide acceptable genomic  
466 control inflation factors. However, we demonstrated through simulation studies that existing  
467 implementations of LMMs for GWAS can provide systematically biased test statistics in samples  
468 with population stratification when phenotypes are correlated with ancestry. Interestingly, we  
469 found that the miscalibration of test statistics from widely used LMM approaches is a problem  
470 that can occur when samples descend from either highly divergent inter-continental populations  
471 or closely related intra-continental populations. Additionally, the problem manifests in the  
472 presence of both discrete population substructure and ancestry admixture.

473         Incorrect calibration of association test statistics from existing LMM methods arises  
474 because they use an empirical GRM calculated as a genome-wide average genotype covariance  
475 to account for the entire sample genealogy, including both distant population structure and  
476 recent familial relatedness. However, as we demonstrated using genotype data from release 3  
477 of phase III of HapMap, allele frequency differences among human populations vary greatly by  
478 SNP across the genome. As a consequence, the strength of the genetic covariance due to  
479 ancestry also varies by SNP across the genome, and existing LMM methods can provide  
480 inadequate correction for population stratification. The ancestry correction provided by these  
481 methods is of appropriate size only for SNPs with typical allele frequency differences between  
482 populations, while SNPs with relatively larger or smaller allele frequency differences receive an

483 under- or over-correction, respectively. This result is contrary to what has previously been  
484 suggested<sup>10</sup>, that SNPs with larger allele frequency differences between populations receive a  
485 larger correction from these LMM methods. Notably, the deflation of test statistics for SNPs  
486 with similar allele frequencies across populations, and the inflation of test statistics for SNPs  
487 that are highly differentiated across populations, balances out across the genome, typically  
488 leading to a genomic control inflation factor near 1 and QQ-plots that look acceptable when  
489 considering all SNPs genome-wide, which likely contributed to why this phenomenon had not  
490 been previously reported.

491 To address this issue, we developed LMM-OPS, which orthogonally partitions the  
492 genealogical structure among sampled individuals into two separate components. Ancestry-  
493 representative vectors are included as fixed effects in the mean model of LMM-OPS to account  
494 for population stratification, and an ancestry-adjusted empirical GRM that is orthogonal to the  
495 ancestry-representative vectors is used to model recent familial relatedness as a random effect.  
496 In simulation studies with real and simulated genotype data, we demonstrated that the LMM-  
497 OPS testing procedure provides well-calibrated association test statistics at *all* SNPs genome-  
498 wide, regardless of the distribution of allele frequency differences among the underlying  
499 populations. In addition to providing better protection against false positives, we also  
500 demonstrated that, compared to existing LMM methods, LMM-OPS provides a more efficient  
501 test with improved power to detect true SNP-phenotype associations. This increase in power  
502 holds even at highly differentiated SNPs, for which existing LMM methods provide  
503 systematically inflated test statistics resulting in an inflated type-I error rate.

504 We also compared the performance of LMM-OPS to existing implementations of LMMs  
505 through a GWAS analysis of white blood cell (WBC) count in the Hispanic cohort of the WHI  
506 SHARe study. This cohort contains multi-way continental ancestry admixture as well as cryptic

507 familial relatedness. All four methods gave similar genotype effect size estimates at SNPs for  
508 WBC count, but LMM-OPS was the most efficient, providing consistently smaller standard errors  
509 and genome-wide significant  $p$ -values that were more significant, by one or more orders of  
510 magnitude, than EMMAX, GEMMA, and GCTA. Using LMM-OPS, we were able to replicate  
511 generalize to this Hispanic American population ( $p = 1.89 \times 10^{-18}$ ) the association at regulatory  
512 variant rs2814778 in the Duffy Antigen Receptor for Chemokines (DARC) gene previously  
513 identified in African Americans. Because of natural selection, rs2814778 is highly differentiated  
514 between African and European ancestral populations, likely due to a protective effect against *P.*  
515 *vivax* malaria<sup>34,35</sup>. Furthermore, through a conditional analysis including rs2814778 as a  
516 covariate, we were able to demonstrate that other genome-wide significant associations in this  
517 region on chromosome 1 could be explained by LD with this particular variant.

518 In the implementation of LMM-OPS presented here, we utilized ancestry-representative  
519 principal components (PCs) from PC-AiR to adjust for population structure and construct an  
520 orthogonal ancestry-adjusted empirical GRM to account for relatedness. Alternatively, vectors  
521 of estimated individual admixture proportions from model-based methods such as  
522 ADMIXTURE<sup>36</sup> or FRAPPE<sup>37</sup> could be used in place of PCs. We also performed the LMM-OPS  
523 analysis of WBC count in the Hispanic American cohort of the WHI-SHARe using model-based  
524 estimates of individual ancestry from a supervised ADMIXTURE analysis that included reference  
525 population samples from the International Haplotype Map Project (HapMap) and the Human  
526 Genome Diversity Project (HGDP)<sup>38</sup> for European, Native American, African, and East Asian  
527 ancestry. The results were nearly identical to the analysis that used PCs (Figure S9). In general,  
528 using model-based estimates of ancestry with LMM-OPS is expected to work well, provided that  
529 prior assumptions regarding the underlying populations contributing ancestry to the sample are  
530 accurate and suitable reference population panels representative of these populations are

531 available for reliable estimation of ancestry. For many genetic studies, however, the underlying  
532 ancestral populations may not be completely known or well defined, and misspecification of the  
533 ancestral populations will result in less efficient association tests due to biased estimates of  
534 individual ancestry from model-based methods. For this reason, we recommend using PCs with  
535 LMM-OPS, as they do not rely on strong modeling assumptions.

536         Numerous LMM approaches for GWAS have been proposed in the past few years, each  
537 with small variations on the testing procedure. One variation among these methods lies in SNP  
538 selection for constructing the empirical GRM. In each of the analyses performed here, the GRM  
539 was constructed from all SNPs genome-wide with sample minor allele frequency (MAF) greater  
540 than 1%. Others have suggested that including the SNP being tested, or SNPs in LD with the one  
541 being tested, leads to proximal contamination and a loss of power<sup>6,10</sup>. This has led to the  
542 development of automated methods for selecting subsets of SNPs to be used in the GRM<sup>6</sup>, as  
543 well as the leave-one-chromosome-out (LOCO) approach<sup>10</sup>, where the GRM is constructed from  
544 all autosomal SNPs not on the same chromosome as the SNP being tested. While not presented  
545 here, LMM-OPS can easily incorporate using a subset of SNPs or a LOCO approach for  
546 constructing the ancestry-adjusted GRM. However, it remains unclear as to what the optimal  
547 set of SNPs is for obtaining the GRM. Using a subset of SNPs, as is done with FaST-LMM-Select<sup>6</sup>,  
548 may improve power, but it may also provide inadequate control of type-I error rates<sup>39</sup>. When  
549 there is family relatedness among samples, this remains true even if PCs are included in the  
550 model<sup>39</sup>. Similarly, using a LOCO approach, such as that implemented in GCTA-LOCO<sup>10</sup>, may also  
551 improve power, but may inadequately account for the effects of SNPs on the same chromosome  
552 as the SNP being tested. A hybrid method that uses two GRMs, one constructed from all SNPs,  
553 and the other from a selected subset of SNPs, has also been proposed<sup>39</sup>. However, this  
554 approach remains susceptible to the systematic inflation/deflation issues illustrated in this work



555 for phenotypes correlated with ancestry. We have demonstrated that LMMs for GWAS should  
556 certainly include ancestry-representative vectors as fixed effects to account for population  
557 stratification, but exactly which SNPs should be used to construct the empirical GRM in order to  
558 optimize power, while still adequately protecting against false positives due to family structure,  
559 remains an open area of research.

560

## 561 **Appendix A**

### 562 *Sample Structure Inference*

563 Population structure inference for LMM-OPS and for linear regression adjusted with PCs was  
564 performed using PC-AiR<sup>25</sup>. PC-AiR used SNPs LD-pruned with an  $r^2 = 0.1$  threshold in a sliding  
565 10Mb window for the HapMap and WHI-SHARE analyses, and it used all SNPs in Set 1 for the  
566 simulations with admixture. Inference on recent genetic relatedness due to family structure for  
567 LMM-OPS was performed using PC-Relate<sup>23</sup>; these kinship coefficient estimates were used to  
568 construct the ancestry-adjusted empirical GRM. EMMAX, GEMMA, and GCTA each used the  
569 default empirical GRM created by the respective software to infer all sample structure. The  
570 GRM for each method was constructed from all of the autosomal SNPs with minor allele  
571 frequency (MAF) > 1% in the HapMap and WHI-SHARE analyses, and from all SNPs in Set 1 in the  
572 simulations with admixture.

573

## 574 **Appendix B**

### 575 *Simulated Genotype Data with Admixture*

576 For each of the three simulated data sets with admixture, allele frequencies for the two  
577 populations at all 200,000 SNPs were generated using the Balding-Nichols model<sup>30</sup>. More  
578 precisely, for each SNP  $s$ , the allele frequency  $p_s$  in the ancestral population was drawn from a

579 uniform distribution on [0.1, 0.9]. The allele frequency in each population was then drawn from  
580 a beta distribution with parameters  $p_s(1-F_{ST})/F_{ST}$  and  $(1-p_s)(1-F_{ST})/F_{ST}$ , where the quantity  $F_{ST}$  is  
581 Wright's measure of genetic distance between populations<sup>27</sup>. The vector  $\mathbf{p}_s$  contains the allele  
582 frequencies at SNP  $s$  for each population. An individual's vector of ancestry proportions from  
583 each of the two populations can be represented by  $\mathbf{a}_i^T = (a, 1-a)$ . The parameter  $a$  was  
584 drawn from a beta distribution with mean 0.3 and s.d. 0.1 for one third of unrelated individuals  
585 and pedigree founders, a beta distribution with mean 0.7 and s.d. 0.1 for another third, and a  
586 uniform distribution on [0,1] for the remaining third. Within any given pedigree, every founder  
587 had  $a$  drawn from the same distribution. As a result, individuals in a pedigree for which  
588 founder ancestry proportions were drawn from either of the beta distributions had similar  
589 ancestry to each other, which could be viewed as a type of ancestry-related assortative mating.  
590 Ancestry proportions for pedigree descendants were calculated as the average of their parents'  
591 ancestry proportions. Genotypes for unrelated individuals and pedigree founders were  
592 randomly drawn from a  $\text{Bin}(2, \mathbf{a}_i^T \mathbf{p}_s)$  distribution, and alleles were passed down the pedigree  
593 to generate genotypes for pedigree descendants (including the cousin pairs).

594

### 595 *Simulated Phenotypes*

596 For the simulations used to assess behavior at null SNPs, each replicate of the heritable  
597 phenotype whose mean depended on genome-wide ancestry (or population membership) was  
598 generated according to the model

$$599 \quad \mathbf{Y} = \sum_{s \in \mathcal{S}_c} \mathbf{x}_s \beta_s + \gamma \mathbf{a} + \epsilon, \quad (6)$$

600 where  $\mathcal{S}_c$  is a set of 100 randomly selected causal SNPs,  $\mathbf{x}_s$  is the vector of genotype values for  
601 all individuals at SNP  $s \in \mathcal{S}_c$  with effect size  $\beta_s$  chosen using sample allele frequencies so that  
602 SNP  $s$  explains 0.1% of the phenotypic variability,  $\mathbf{a}$  is the vector of ancestry proportions for all  
603 individuals with effect size  $\gamma$ , and  $\epsilon_i \sim N(0,1)$  is independent random noise. In the simulations  
604 using the HapMap genotype data, SNPs for  $\mathcal{S}_c$  were selected randomly from chromosome 1,  $\mathbf{a}$   
605 was 1 for an individual in the CEU population and 0 otherwise, and  $\gamma = 1$ . In the simulations  
606 using the simulated genotype data with admixture, SNPs for  $\mathcal{S}_c$  were randomly chosen from Set  
607 2,  $\mathbf{a}$  was an individual's ancestry proportion from population 1, and  $\gamma = 2$ .

608 For the simulations used to evaluate detection of causal SNPs, each of the causal SNP-  
609 phenotype pairs was generated according to the model

$$610 \quad \mathbf{Y} = \mathbf{x}_{s'}\beta_{s'} + \sum_{s \in \mathcal{S}_c} \mathbf{x}_s\beta_s + \gamma\mathbf{a} + \epsilon. \quad (7)$$

611 This is the same model as in Equation (6) but with one additional causal SNP of interest,  $s'$ . In  
612 the simulations using the simulated genotype data with admixture,  $s'$  was selected at random  
613 from Set 2. The effect size  $\beta_{s'}$  for SNP  $s'$  was chosen to explain a pre-specified proportion of the  
614 phenotypic variability, denoted  $h_{s'}^2$ , and 10,000 replicate SNP-phenotype pairs were simulated  
615 for each choice of  $h_{s'}^2 \in \{0.75\%, 1.00\%, 1.25\%, 1.50\%\}$ .

616

### 617 **Supplemental Data**

618 Supplemental data include 9 Figures and 3 Tables.

619

620

621 **Acknowledgements**

622 This work was supported in part National Institutes of Health (NIH) grants P01 GM 099568 (to  
623 T.A.T.), K01 CA148958 (to T.A.T), R01 HG001645 (to M.S.M.), and R01 HL116446 (to A.P.R. and  
624 T.A.T.). The WHI program is funded by the National Heart, Lung, and Blood Institute, National  
625 Institutes of Health, U.S. Department of Health and Human Services through contracts  
626 HHSN268201100046C, HHSN268201100001C, HHSN268201100002C, HHSN268201100003C,  
627 HHSN268201100004C, and HHSN271201100004C. Funding for WHI SNP Health Association  
628 Resource (WHI-SHARe) genotyping was provided by NHLBI contract N02-HL-64278.

629

630 **Web Resources**

631 LMM-OPS is implemented in the R language and is freely available from Bioconductor as part of  
632 the GENESIS package  
633 (<http://www.bioconductor.org/packages/release/bioc/html/GENESIS.html>).

634

635

636

637

638

639

640

641

642

643

644

## 645 References

- 646 1. Yu, J., Pressoir, G., Briggs, W.H., Bi, I.V., Yamasaki, M., Doebley, J.F., McMullen, M.D., Gaut,  
647 B.S., Nielsen, D.M., Holland, J.B. and Kresovich, S. (2006). A unified mixed-model method for  
648 association mapping that accounts for multiple levels of relatedness. *Nat. Genet.* 38, 203-208  
649
- 650 2. Kang, H. M., Zaitlen, N. A., Wade, C. M., Kirby, A., Heckerman, D., Daly, M. J., and Eskin, E.  
651 (2008). Efficient control of population structure in model organism association  
652 mapping. *Genetics*, 178, 1709-1723.  
653
- 654 3. Kang, H. M., Sul, J. H., Service, S. K., Zaitlen, N. A., Kong, S. Y., Freimer, N. B., Sabatti, C., and  
655 Eskin, E. (2010). Variance component model to account for sample structure in genome-wide  
656 association studies. *Nat. Genet.* 42, 348–354  
657
- 658 4. Zhang, Z., Ersoz, E., Lai, C. Q., Todhunter, R. J., Tiwari, H. K., Gore, M. A., Bradbury, P.J., Yu, J.,  
659 Arnett, D.K., Ordovas, J.M., and Buckler, E. S. (2010). Mixed linear model approach adapted for  
660 genome-wide association studies. *Nat. Genet.* 42, 355  
661
- 662 5. Lippert, C., Listgarten, J., Liu, Y., Kadie, C.M., Davidson, R.I., and Heckerman, D. (2011). FaST  
663 linear mixed models for genome-wide association studies. *Nat. Methods* 8, 833–835  
664
- 665 6. Listgarten, J., Lippert, C., Kadie, C. M., Davidson, R. I., Eskin, E., and Heckerman, D. (2012).  
666 Improved linear mixed models for genome-wide association studies. *Nat. Methods* 9, 525–526  
667
- 668 7. Svishcheva, G.R., Axenovich, T.I., Belonogova, N.M., van Duijn, C.M., and Aulchenko, Y.S.  
669 (2012). Rapid variance components-based method for whole-genome association analysis. *Nat.*  
670 *Genet.* 44, 1166-1170
- 671 8. Zhou, X., and Stephens, M. (2012). Genome-wide efficient mixed-model analysis for  
672 association studies. *Nat. Genet.* 44, 821–824  
673
- 674 9. Listgarten, J., Lippert, C., and Heckerman, D. (2013). FaST-LMM-Select for addressing  
675 confounding from spatial structure and rare variants. *Nat. Genet.* 45, 470-471  
676
- 677 10. Yang, J., Zaitlen, N.A., Goddard, M.E., Visscher, P.M., and Price, A.L. (2014). Advantages and  
678 pitfalls in the application of mixed-model association methods. *Nat. Genet.* 46, 100-106  
679
- 680 11. Hayes, B.J., Visscher, P.M., and Goddard, M.E. (2009). Increased accuracy of artificial  
681 selection by using the realized relationship matrix. *Genet. Res.* 91, 47-60  
682
- 683 12. Yang, J., Benyamin, B., McEvoy, B.P., Gordon, S., Henders, A.K., Nyholt, D.R., Madden, P.A.,  
684 Heath, A.C., Martin, N.G., Montgomery, G.W., et al. (2010). *Nat. Genet.* 42, 565-569  
685
- 686 13. Yang, J., Lee, S.H., Goddard, M.E., and Visscher, P.M. (2011). GCTA: a tool for genome-wide  
687 complex trait analysis. *Am. J. Hum. Genet.* 88, 76-82  
688
- 689 14. Devlin, B., and Roeder, K. (1999). Genomic control for association studies. *Biometrics* 55,  
690 997–1004

- 691  
692 15. Price, A.L., Zaitlen, N.A., Reich, D. and Patterson, N. (2010). New approaches to population  
693 stratification in genome-wide association studies. *Nat. Rev. Genet.* 11, 459–463  
694  
695 16. Wu, C., DeWan, A., Hoh, J. & Wang, Z. (2011). A comparison of association methods  
696 correcting for population stratification in case–control studies. *Ann. Hum. Genet.* 75, 418-427  
697  
698 17. The International HapMap Consortium. (2005). A haplotype map of the human genome.  
699 *Nature* 437, 1299–1320  
700  
701 18. Hays, J., Hunt, J. R., Hubbell, F. A., Anderson, G. L., Limacher, M., Allen, C., and Rossouw, J. E.  
702 (2003). The women’s health initiative recruitment methods and results. *Ann. Epidemiol.* 13,  
703 S18-S77  
704  
705 19. Anderson, G., Cummings, S., Freedman, L.S., Furberg, C., Henderson, M., Johnson, S.R.,  
706 Kuller, L., Manson, J., Oberman, A., Prentice, R.L. and Rossouw, J.E. (1998). Design of the  
707 Women’s Health Initiative clinical trial and observational study. *Control. Clin. Trials* 19, 61–109  
708  
709 20. Thornton, T., Tang, H., Hoffmann, T. J., Ochs-Balcom, H. M., Caan, B. J., & Risch, N.  
710 (2012). Estimating kinship in admixed populations. *Am. J. Hum. Genet.* 91, 122-138  
711  
712 21. Jain, D., Hodonsky, C.J., Schick, U.M., Morrison, J.V., Minnerath, S., Brown, L., Schurmann, C.,  
713 Liu, Y., Auer, P.L., Laurie, C.A., Taylor, K.D., et al. (2017). Genome-wide association of white  
714 blood cell counts in Hispanic/Latino Americans: the Hispanic Community Health Study/Study of  
715 Latinos. *Hum. Mol Genet.* 26, 1193-1204  
716  
717 22. Reich, D., Nalls, M.A., Kao, W.L., Akylbekova, E.L., Tandon, A., Patterson, N., Mullikin, J.,  
718 Hsueh, W.C., Cheng, C.Y., Coresh, J., and Boerwinkle, E. (2009). Reduced neutrophil count in  
719 people of African descent is due to a regulatory variant in the Duffy antigen receptor for  
720 chemokines gene. *PLoS Genet.* 5, e1000360  
721  
722 23. Reiner, A.P., Lettre, G., Nalls, M.A., Ganesh, S.K., Mathias, R., Austin, M.A., Dean, E., Arepalli,  
723 S., Britton, A., Chen, Z., and Couper, D. (2011). Genome-wide association study of white blood  
724 cell count in 16,388 African Americans: the continental origins and genetic epidemiology  
725 network (COGENT). *PLoS Genet.* 7, e1002108  
726  
727 24. Conomos, M.P., Reiner, A.P., Weir, B.S., and Thornton T.A. (2016). Model-free estimation of  
728 recent genetic relatedness. *Am. J. Hum. Genet.* 98, 127-148  
729  
730 25. Lynch, M., and Walsh, B. *Genetics and Analysis of Quantitative Traits* (Sinauer, Sunderland,  
731 Massachusetts, 1998).  
732  
733 26. Conomos, M.P., Miller, M., and Thornton, T. (2015). Robust inference of population  
734 structure for ancestry prediction and correction of stratification in the presence of relatedness.  
735 *Genet. Epidemiol.* 39, 276-293  
736

- 737 27. Price, A.L., Patterson, N.J., Plenge, R.M., Weinblatt, M.E., Shadick, N.A., and Reich, D. (2006).  
738 Principal components analysis corrects for stratification in genomewide association studies. *Nat.*  
739 *Genet.* 38, 904–909  
740
- 741 28. Wright, S. (1949). The genetical structure of populations. *Ann. Eugen.* 15, 323–354  
742
- 743 29. Nelis, M., Esko, T., Mägi, R., Zimprich, F., Zimprich, A., Toncheva, D., Karachanak, S.,  
744 Piskáčková, T., Balašćák, I., Peltonen, L., and Jakkula, E. (2009). Genetic structure of Europeans: a  
745 view from the North–East. *PLoS One* 4, e5472  
746
- 747 30. Bhatia, G., Patterson, N., Sankararaman, S. and Price, A.L. (2013). Estimating and  
748 interpreting FST: the impact of rare variants. *Genome Res.* 23, 1514-1521  
749
- 750 31. Balding, D.J., and Nichols, R.A. (1995). A method for quantifying differentiation between  
751 populations at multi-allelic loci and its implications for investigating identify and paternity.  
752 *Genetica* 96, 3–12  
753
- 754 32. Reiner, A.P., Beleza, S., Franceschini, N., Auer, P.L., Robinson, J.G., Kooperberg, C., Peters,  
755 U., and Tang, H. (2012). Genome-wide association and population genetic analysis of C-reactive  
756 protein in African American and Hispanic American women. *Am. J. Hum. Genet.* 91, 502–512  
757
- 758 33. Liu E.Y., Li M., Wang W., and Li Y. (2012). MaCH-Admix: genotype imputation for admixed  
759 populations. *Genet. Epidemiol.* 37, 25-37  
760
- 761 34. Miller, L.H., Mason, S.J., Clyde, D.F., and McGinniss, M.H. (1976). The resistance factor to  
762 *Plasmodium vivax* in blacks: the Duffy-blood-group genotype, FyFy. *New Engl. J. Med.*, 295, 302-  
763 304  
764
- 765 35. Horuk, R., Chitnis, C.E., Darbonne, W.C., Colby, T.J., Rybicki, A., Hadley, T.J., and Miller, L.H.  
766 (1993). A receptor for the malarial parasite *Plasmodium vivax*: the erythrocyte chemokine  
767 receptor. *Science* 261, 1182-1184  
768
- 769 36. Alexander, D.H., Novembre, J., and Lange, K. (2009). Fast model-based estimation of  
770 ancestry in unrelated individuals. *Genome Res.* 19, 1655-1664  
771
- 772 37. Tang, H., Peng, J., Wang, P., and Risch, N.J. (2005). Estimation of individual admixture:  
773 analytical and study design considerations. *Genet. Epidemiol.* 28, 289-301  
774
- 775 38. Li, J.Z., Absher, D.M., Tang, H., Southwick, A.M., Casto, A.M., Ramachandran, S., Cann, H.M.,  
776 Barsh, G.S., Feldman, M., Cavalli-Sforza, L.L., and Myers, R.M. (2008). Worldwide human  
777 relationships inferred from genome-wide patterns of variation. *Science* 319, 1100-1104  
778
- 779 39. Widmer, C., Lippert, C., Weissbrod, O., Fusi, N., Kadie, C., Davidson, R., Listgarten, J., and  
780 Heckerman, D. (2014). Further improvements to linear mixed models for genome-wide  
781 association studies. *Sci. Rep.* 4, 6874  
782  
783  
784

785 **Figure Titles and Legends**

786 **Figure 1. Performance of association methods at null SNPs for a phenotype associated with**  
787 **ancestry in the presence of population structure.**

788 Penalized cubic regression splines were used to fit smoothed curves showing the relationship  
789 between the absolute value of the allele frequency difference between the two populations at  
790 SNP  $s$ ,  $D_s$ , and the local mean of the test statistics from each method for the simulations with (A-  
791 B) the joint CEU/YRI sample, and (C-D) the joint CEU/TSI sample. The curves shown are the  
792 average relationship across all 1,000 simulated replicates (individual points are omitted for  
793 visual clarity). The shaded regions show estimated 95% confidence intervals. (A and C) The  
794 curves are fit to all SNPs, and the range of  $D_s$  is held to  $[0,1]$ . (B) The curves are fit to the 98.6%  
795 of SNPs with  $D_s \leq 0.6$ . (D) The curves are fit to the 99.9% of SNPs with  $D_s \leq 0.2$ .

796

797

798 **Figure 2. Performance of association methods at null SNPs for a phenotype associated with**  
799 **ancestry in admixed populations.**

800 Penalized cubic regression splines were used to fit smoothed curves showing the relationship  
801 between the absolute value of the allele frequency difference between the two populations at  
802 SNP  $s$ ,  $D_s$ , and the local mean of the test statistics from each method for the simulations with  
803 admixture from a pair of populations with (A)  $F_{ST} = 0.15$ , (B)  $F_{ST} = 0.05$ , and (C)  $F_{ST} = 0.01$ . The  
804 curves shown are the average relationship across all 1,000 simulated replicates (individual  
805 points are omitted for visual clarity). The shaded regions show estimated 95% confidence  
806 intervals. The range of  $D_s$  is kept the same in each panel to emphasize that EMMAX and GEMMA  
807 provide inflated (deflated) test statistics at the largest (smallest) values of  $D_s$ , regardless of its  
808 range. (D) Cumulative distribution functions showing the distribution of  $D_s$  values for each  
809 choice of  $F_{ST}$ .

810

811

812 **Figure 3. Modified  $p$ -value QQ-plots for different classes of null SNPs.**

813 QQ-plots of  $p$ -values for (A) all SNPs, (B) highly differentiated SNPs, (C) moderately  
814 differentiated SNPs, and (D) weakly differentiated SNPs are presented for LMM-OPS, EMMAX,  
815 and GEMMA from the simulation with admixture from a pair of populations with  $F_{ST} = 0.15$ . To  
816 more easily see deviation from the null, the y-axis is the difference between the observed and  
817 expected  $-\log_{10}(p\text{-values})$  rather than the observed. Points above the gray cone indicate  
818 inflation, and points below indicate deflation.

819

820

821 **Figure 4. Comparison of power of LMM methods for a phenotype associated with ancestry in**  
822 **the simulation study with admixture and  $F_{ST} = 0.15$ .**

823 The power of LMM-OPS, EMMAX, and GEMMA to detect causal SNPs with  $h^2 = 0.75\%$ ,  $1.00\%$ ,  
824  $1.25\%$ , and  $1.50\%$  is shown across all SNPs as well as within the three classes of SNPs defined by  
825 allele frequency differentiation. The points represent the power estimates, and the vertical bars  
826 represent the 95% confidence intervals

827

828

829

830



831 **Figure 5. Association testing results for white blood cell (WBC) count in the Hispanic cohort of**  
832 **the WHI-SHARe study.**

833 QQ-plots for each of the LMM methods with (A) all autosomal SNPs, and (B) autosomal SNPs  
834 excluding chromosome 1. (C) Manhattan plot of the  $-\log_{10}(p\text{-values})$  from LMM-OPS. (D) Direct  
835 comparison of  $-\log_{10}(p\text{-values})$  for all autosomal SNPs from LMM-OPS to each of the other LMM  
836 methods. The EMMAX and GCTA results are presented together, as they were nearly identical  
837 and could not be distinguished in the figures.

838

839

840

841 **Tables**

842

843 **Table 1. Genomic inflation factors,  $\lambda_{GC}$ , at null SNPs for the simulation study with admixture**  
844 **and  $F_{ST} = 0.15$**

| Method           | Genome-Wide    | Highly <sup>a</sup><br>Differentiated | Moderately <sup>b</sup><br>Differentiated | Weakly <sup>c</sup><br>Differentiated |
|------------------|----------------|---------------------------------------|-------------------------------------------|---------------------------------------|
| LMM-OPS          | 1.000 (0.0002) | 0.999 (0.0004)                        | 1.001 (0.0003)                            | 1.001 (0.0005)                        |
| EMMAX            | 1.001 (0.0002) | 1.059 (0.0007)                        | 0.989 (0.0003)                            | 0.973 (0.0005)                        |
| GEMMA            | 1.004 (0.0002) | 1.067 (0.0007)                        | 0.990 (0.0003)                            | 0.973 (0.0005)                        |
| Linear Reg. +PCs | 1.026 (0.0006) | 1.026 (0.0007)                        | 1.027 (0.0007)                            | 1.027 (0.0007)                        |

845 The values presented are the mean (s.e.) across all 1,000 phenotype replicates.

846 <sup>a</sup> Highly differentiated SNPs:  $D_s > 0.28$  between the two populations

847 <sup>b</sup> Moderately differentiated SNPs:  $0.07 < D_s < 0.28$  between the two populations

848 <sup>c</sup> Weakly differentiated SNPs:  $D_s < 0.07$  between the two populations

**Table 2. Genome-wide significant SNPs on chromosome 1 for WBC count in WHI-SHARe Hispanics**

| SNP ID     | Position  | <i>p</i> -value          |                          |                          |                            |                          |                           |                          |                            |
|------------|-----------|--------------------------|--------------------------|--------------------------|----------------------------|--------------------------|---------------------------|--------------------------|----------------------------|
|            |           | LMM-OPS <sup>a</sup>     | LMM-OPS <sup>b</sup>     | EMMAX                    | EMMAX<br>+PCs <sup>c</sup> | GCTA                     | GCTA<br>+PCs <sup>c</sup> | GEMMA                    | GEMMA<br>+PCs <sup>c</sup> |
| rs11265198 | 159450517 | 6.49 x 10 <sup>-13</sup> | 5.75 x 10 <sup>-13</sup> | 2.49 x 10 <sup>-10</sup> | 2.45 x 10 <sup>-10</sup>   | 2.77 x 10 <sup>-10</sup> | 3.39 x 10 <sup>-10</sup>  | 4.00 x 10 <sup>-11</sup> | 4.14 x 10 <sup>-11</sup>   |
| rs2808666  | 159591526 | 1.16 x 10 <sup>-10</sup> | 1.07 x 10 <sup>-10</sup> | 2.53 x 10 <sup>-9</sup>  | 3.65 x 10 <sup>-9</sup>    | 2.75 x 10 <sup>-9</sup>  | 4.44 x 10 <sup>-9</sup>   | 1.05 x 10 <sup>-9</sup>  | 1.70 x 10 <sup>-9</sup>    |
| rs7534472  | 159500861 | 2.62 x 10 <sup>-10</sup> | 2.45 x 10 <sup>-10</sup> | 1.34 x 10 <sup>-8</sup>  | 1.36 x 10 <sup>-8</sup>    | 1.44 x 10 <sup>-8</sup>  | 1.63 x 10 <sup>-8</sup>   | 3.94 x 10 <sup>-9</sup>  | 4.21 x 10 <sup>-9</sup>    |
| rs857682   | 158670244 | 7.92 x 10 <sup>-10</sup> | 6.84 x 10 <sup>-10</sup> | 2.14 x 10 <sup>-8</sup>  | 2.23 x 10 <sup>-8</sup>    | 2.28 x 10 <sup>-8</sup>  | 2.73 x 10 <sup>-8</sup>   | 9.53 x 10 <sup>-9</sup>  | 1.07 x 10 <sup>-8</sup>    |
| rs856065   | 159013653 | 1.47 x 10 <sup>-9</sup>  | 1.44 x 10 <sup>-9</sup>  | 5.41 x 10 <sup>-8</sup>  | 6.55 x 10 <sup>-8</sup>    | 5.73 x 10 <sup>-8</sup>  | 7.56 x 10 <sup>-8</sup>   | 1.82 x 10 <sup>-8</sup>  | 2.45 x 10 <sup>-8</sup>    |
| s6656586   | 159013653 | 2.40 x 10 <sup>-8</sup>  | 2.14 x 10 <sup>-8</sup>  | 3.53 x 10 <sup>-7</sup>  | 3.92 x 10 <sup>-7</sup>    | 3.69 x 10 <sup>-7</sup>  | 4.61 x 10 <sup>-7</sup>   | 1.91 x 10 <sup>-7</sup>  | 2.30 x 10 <sup>-7</sup>    |

The *p*-values are presented for all six SNPs reaching genome-wide significance for WBC count with any of the LMM methods.

<sup>a</sup>LMM-OPS when using the PC-Relate ancestry-adjusted empirical GRM; <sup>b</sup>LMM-OPS when using the centered only ancestry-adjusted empirical GRM. <sup>c</sup>The results labeled “+PCs” are from each of the respective LMM methods when the top 6 PCs from PC-AiR are included as fixed effect covariates



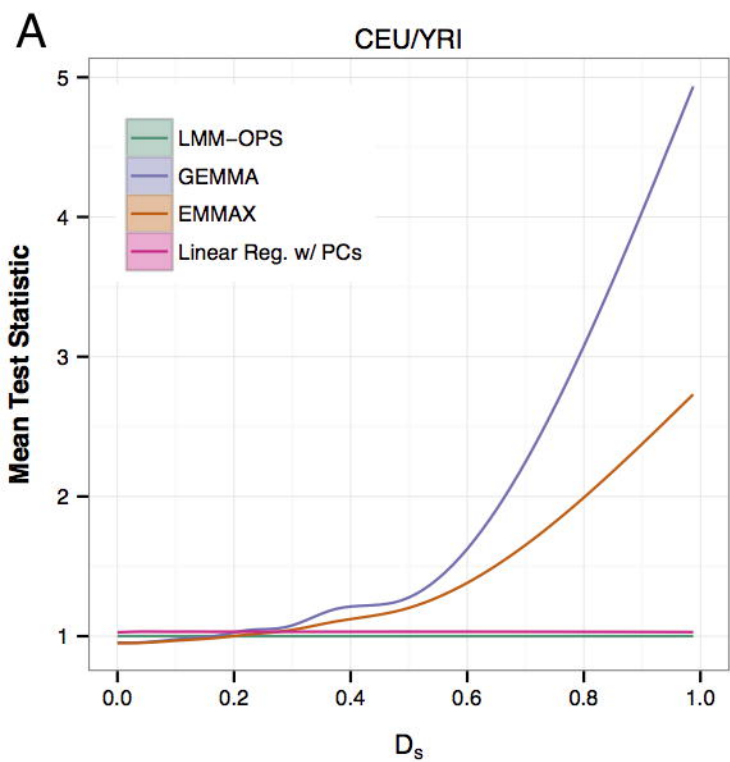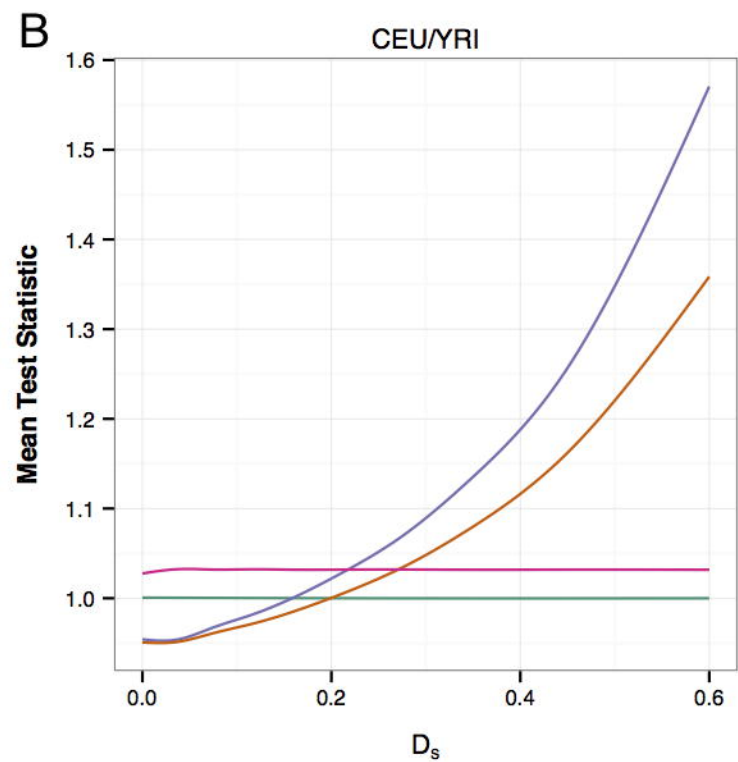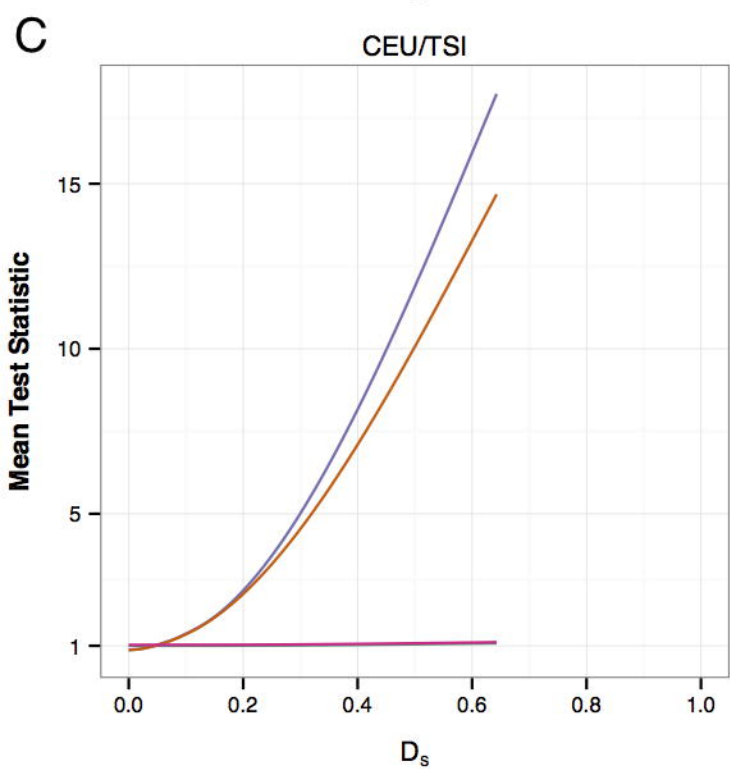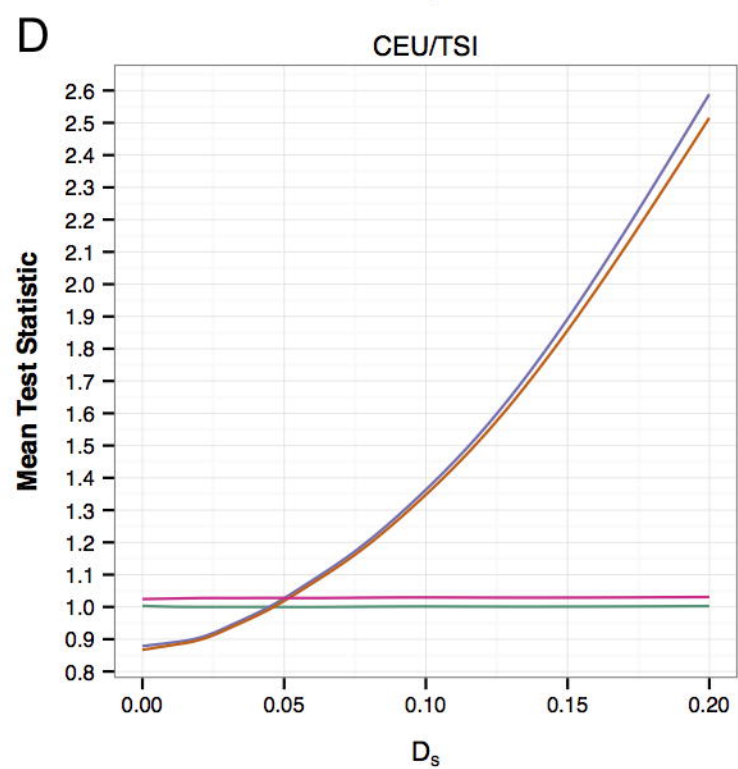

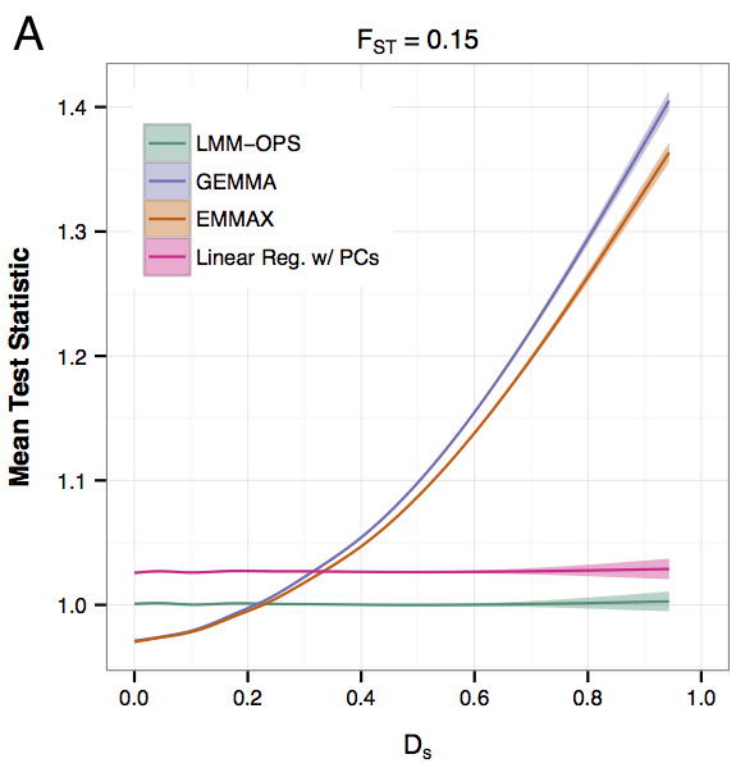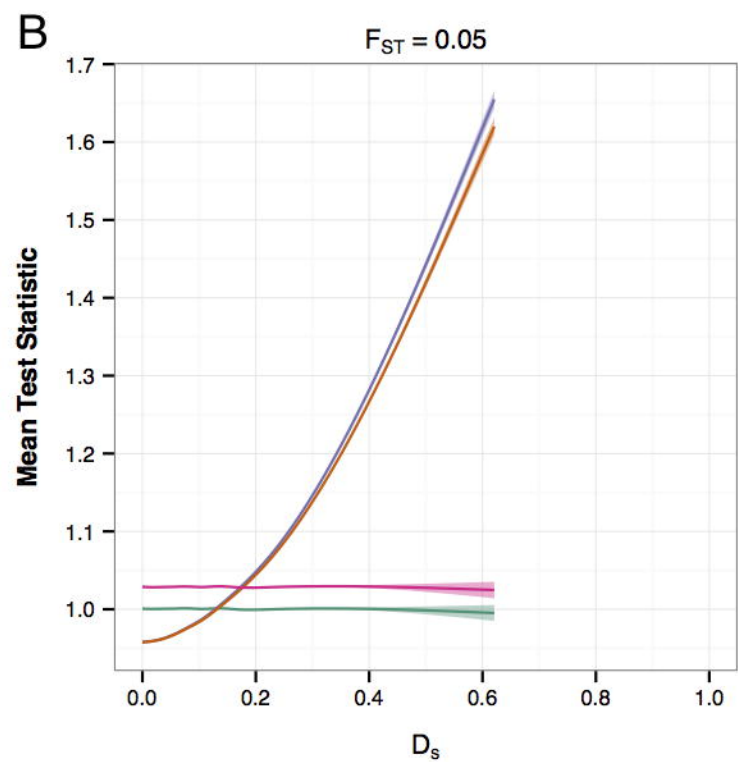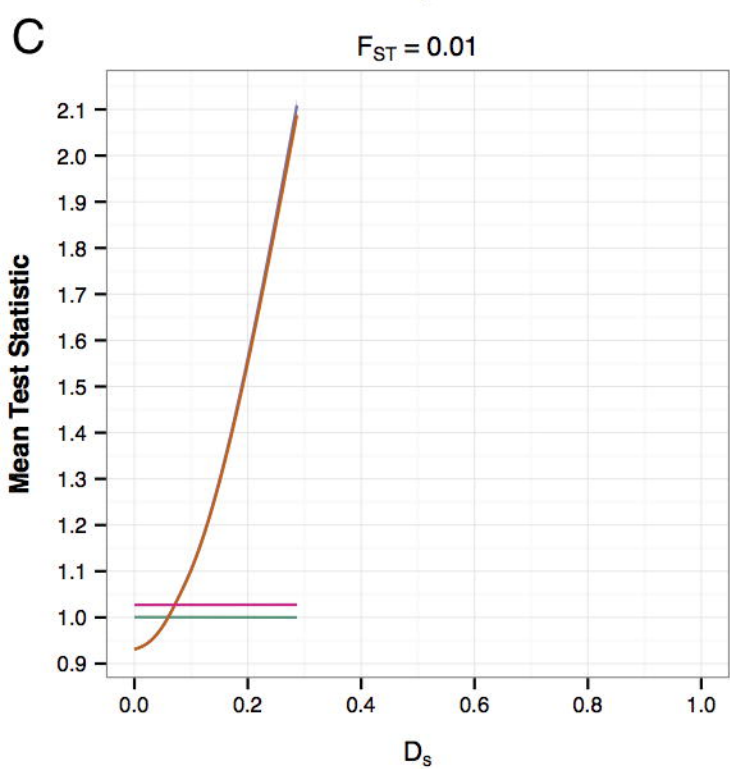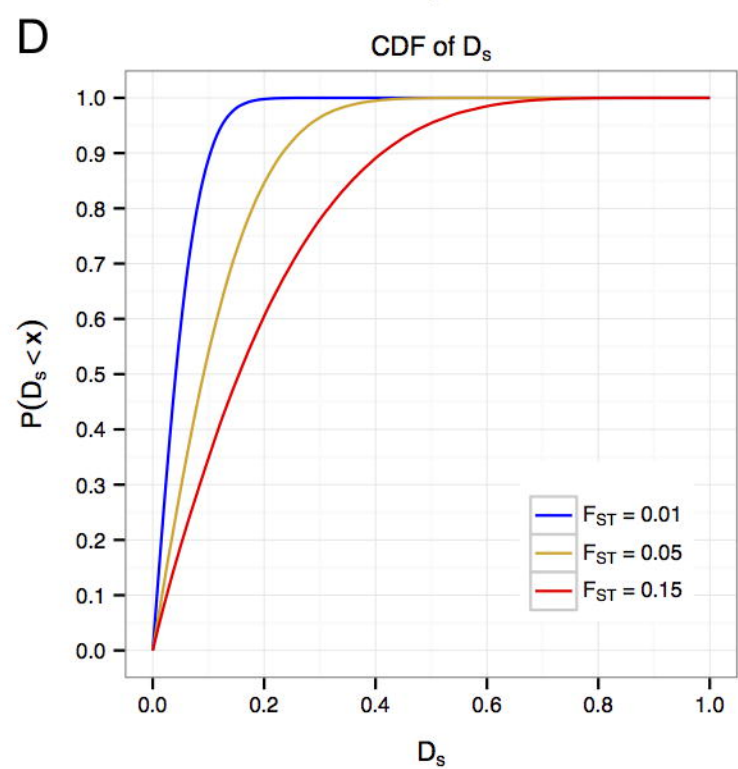

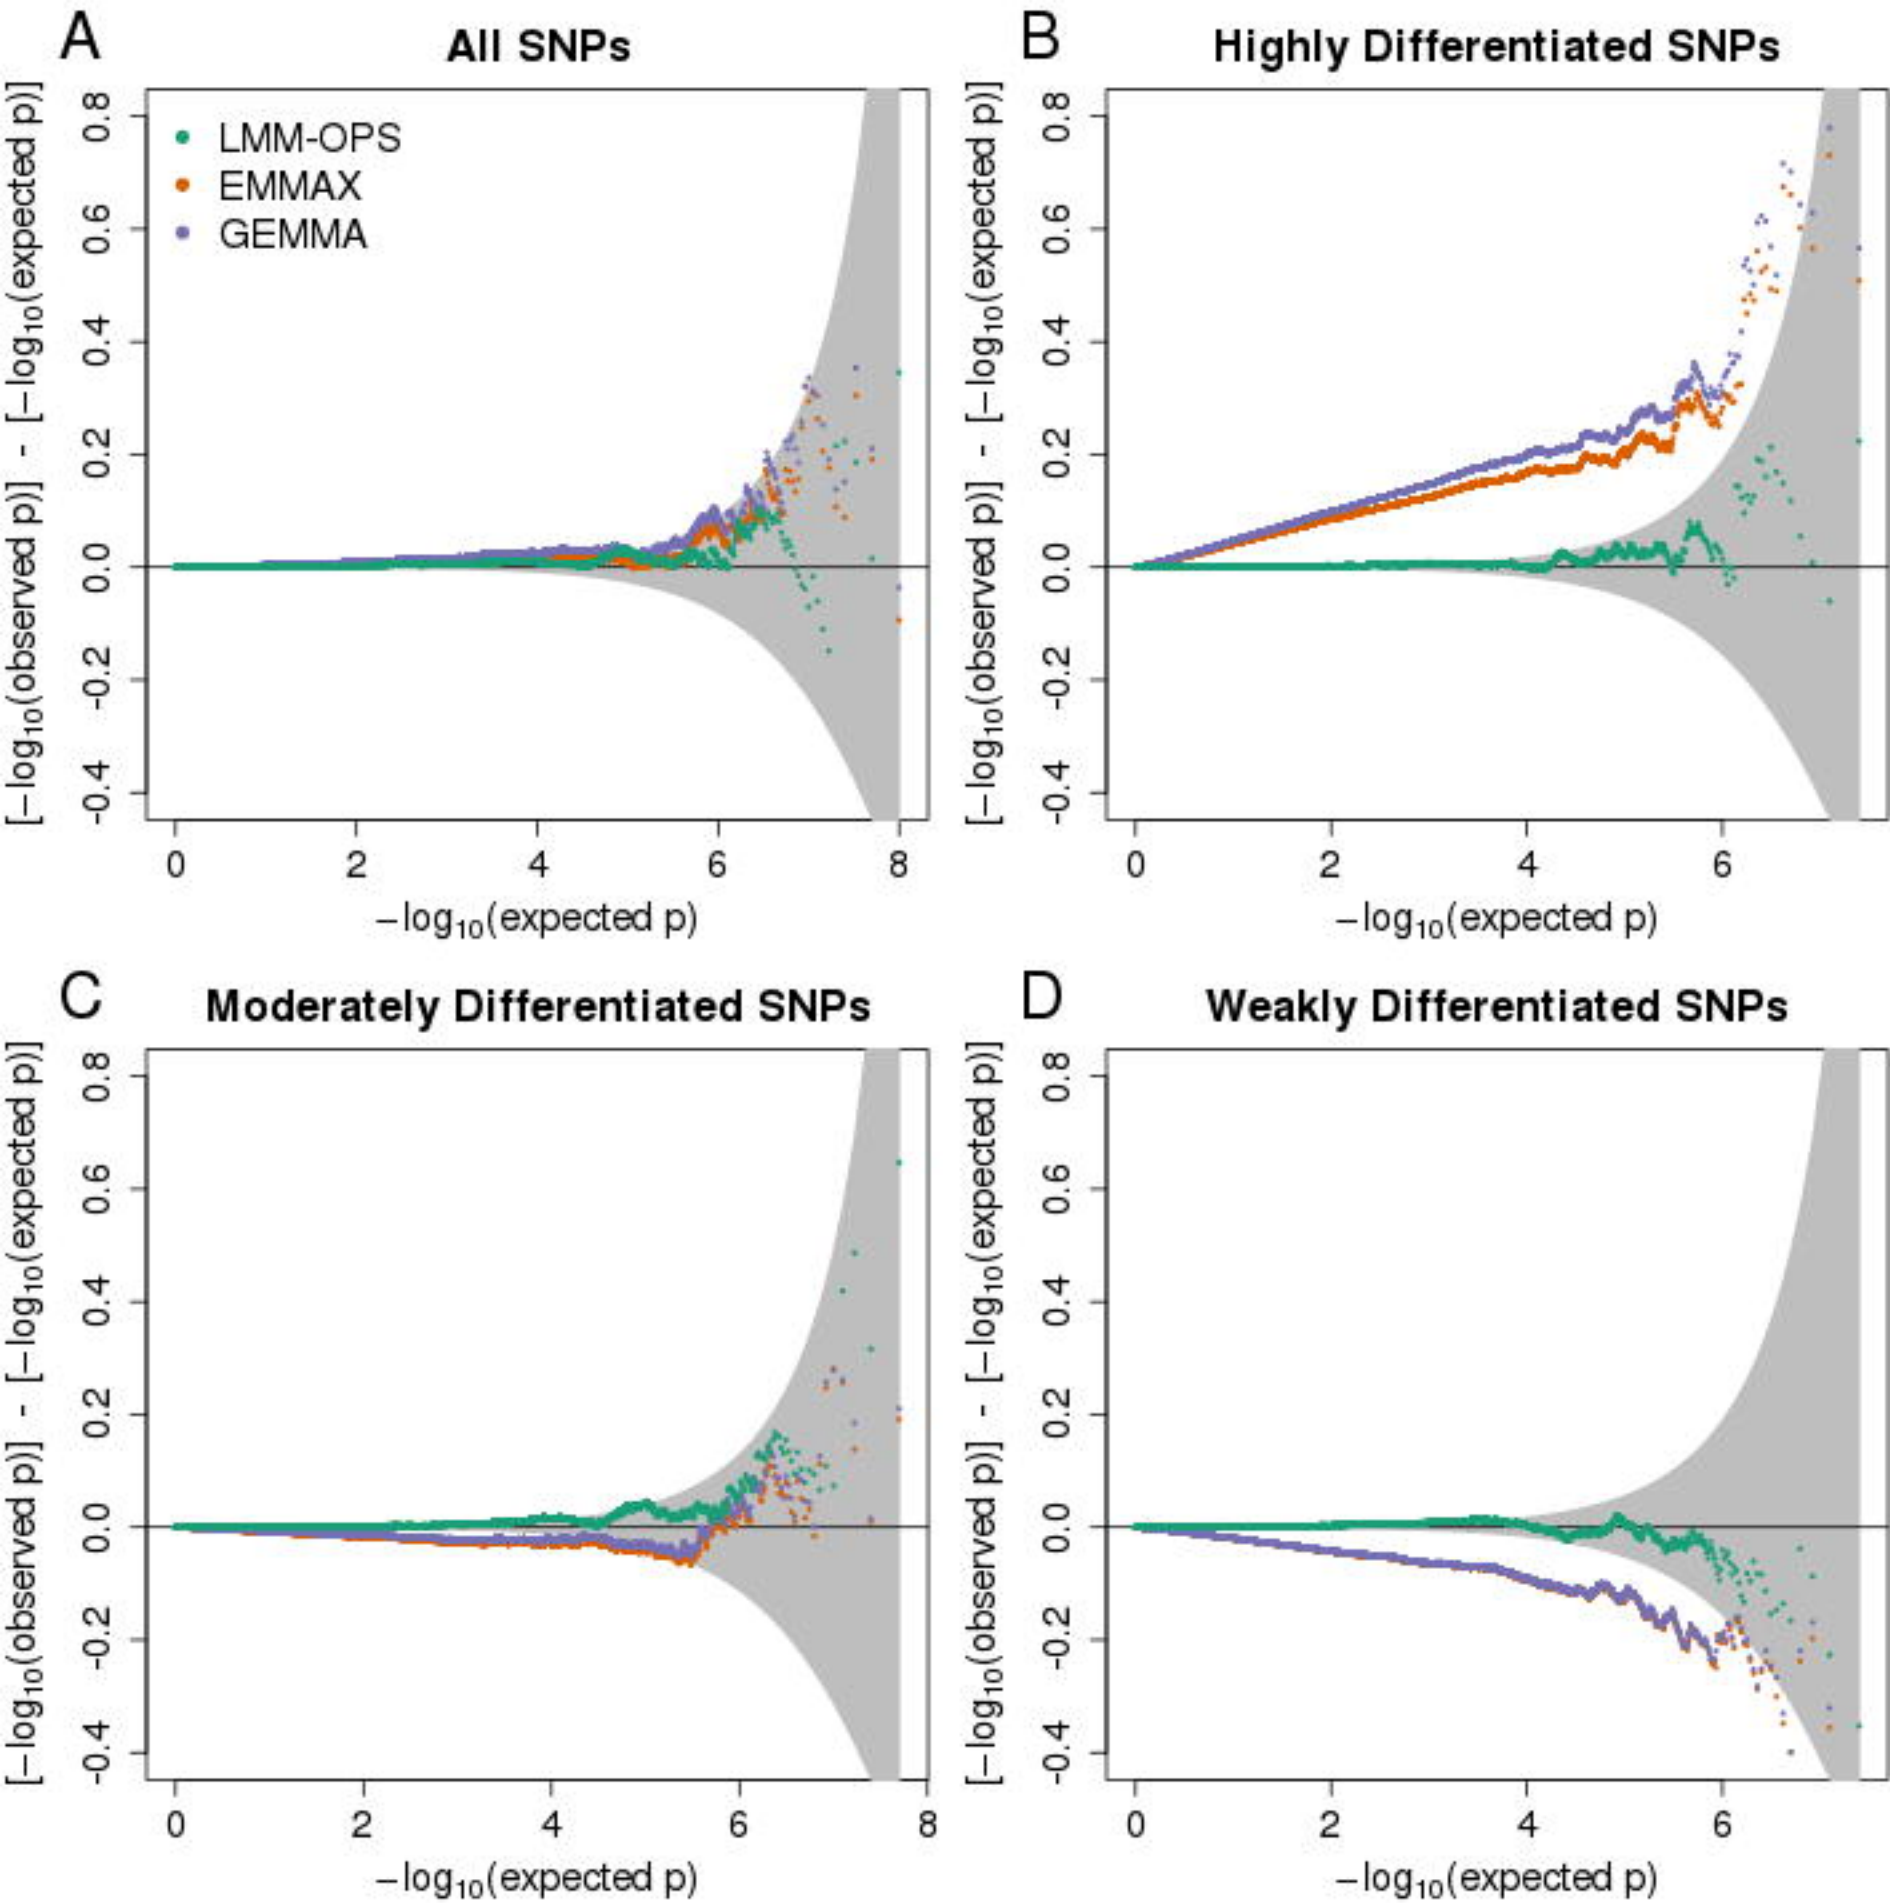

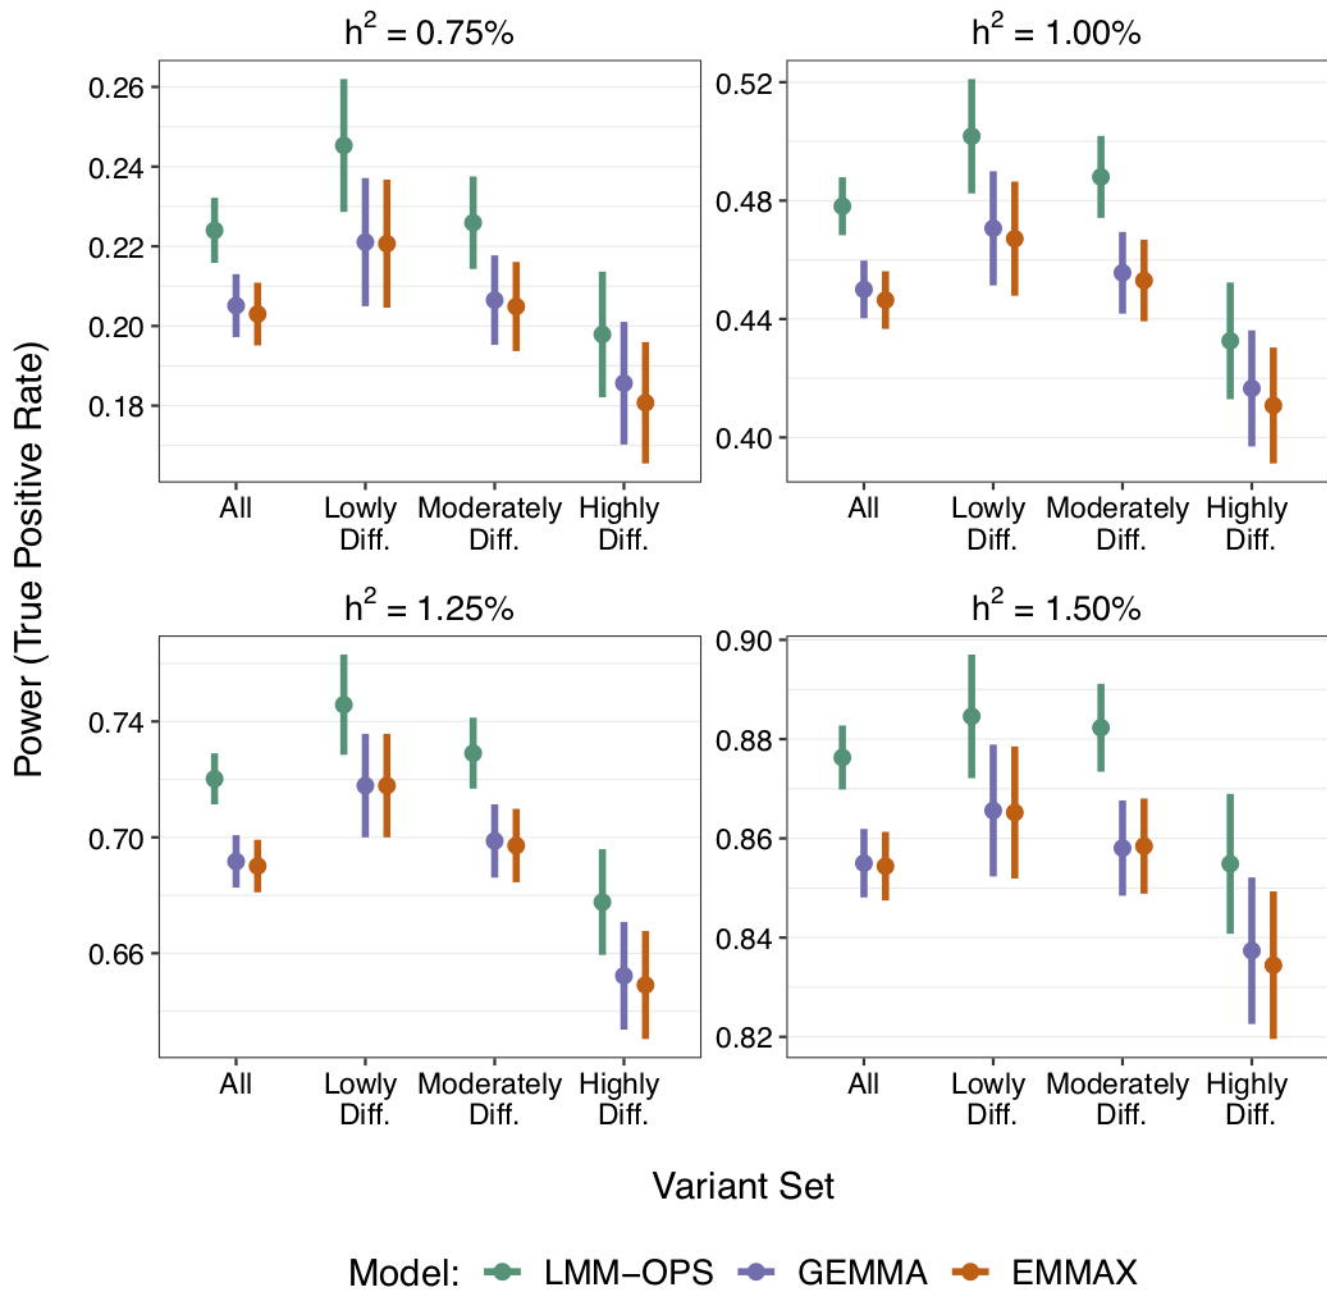

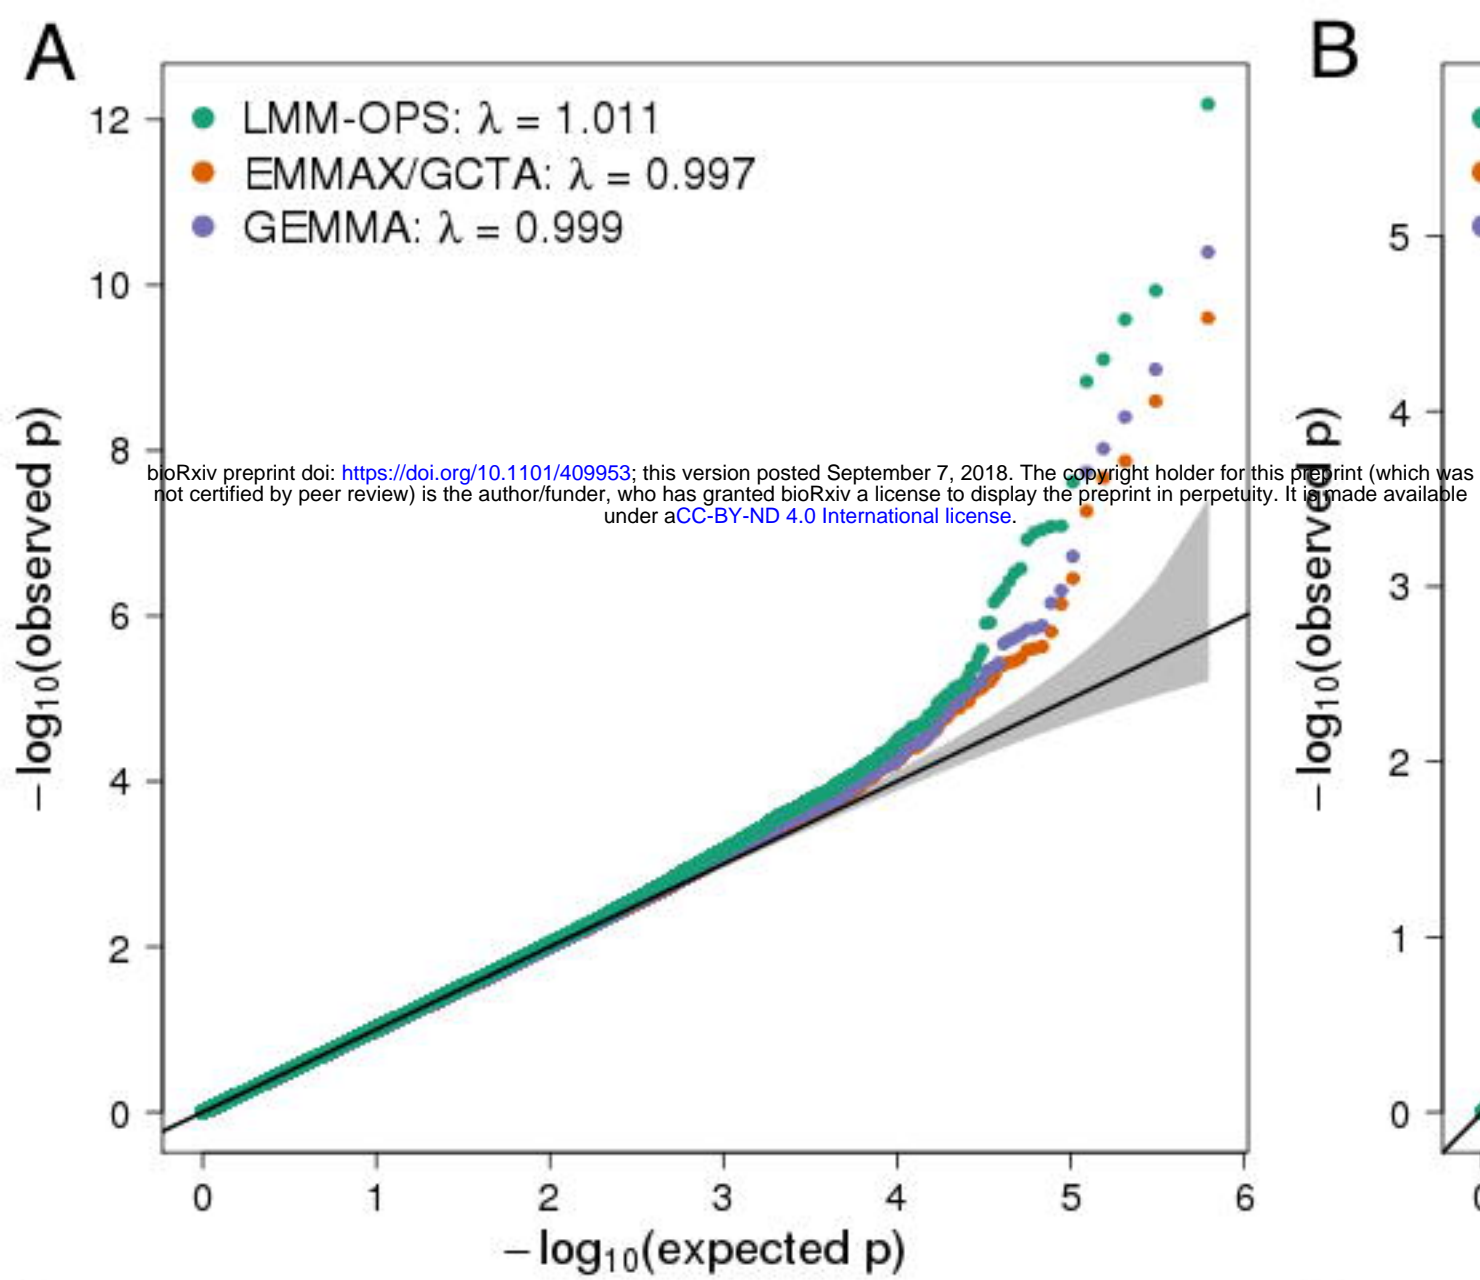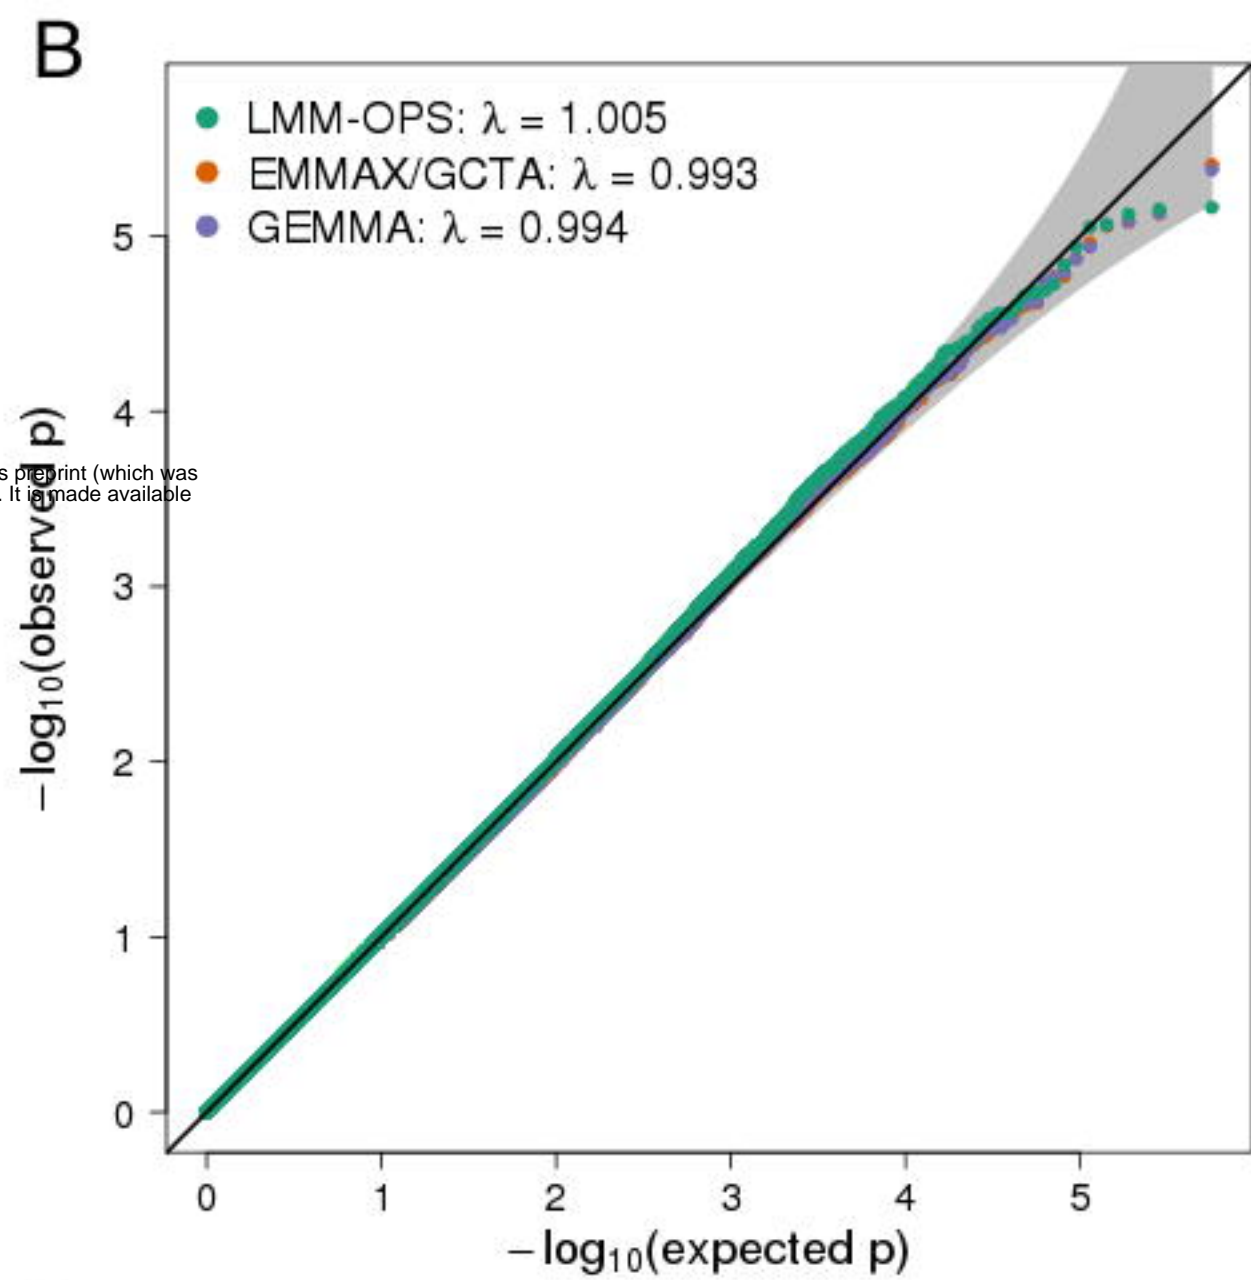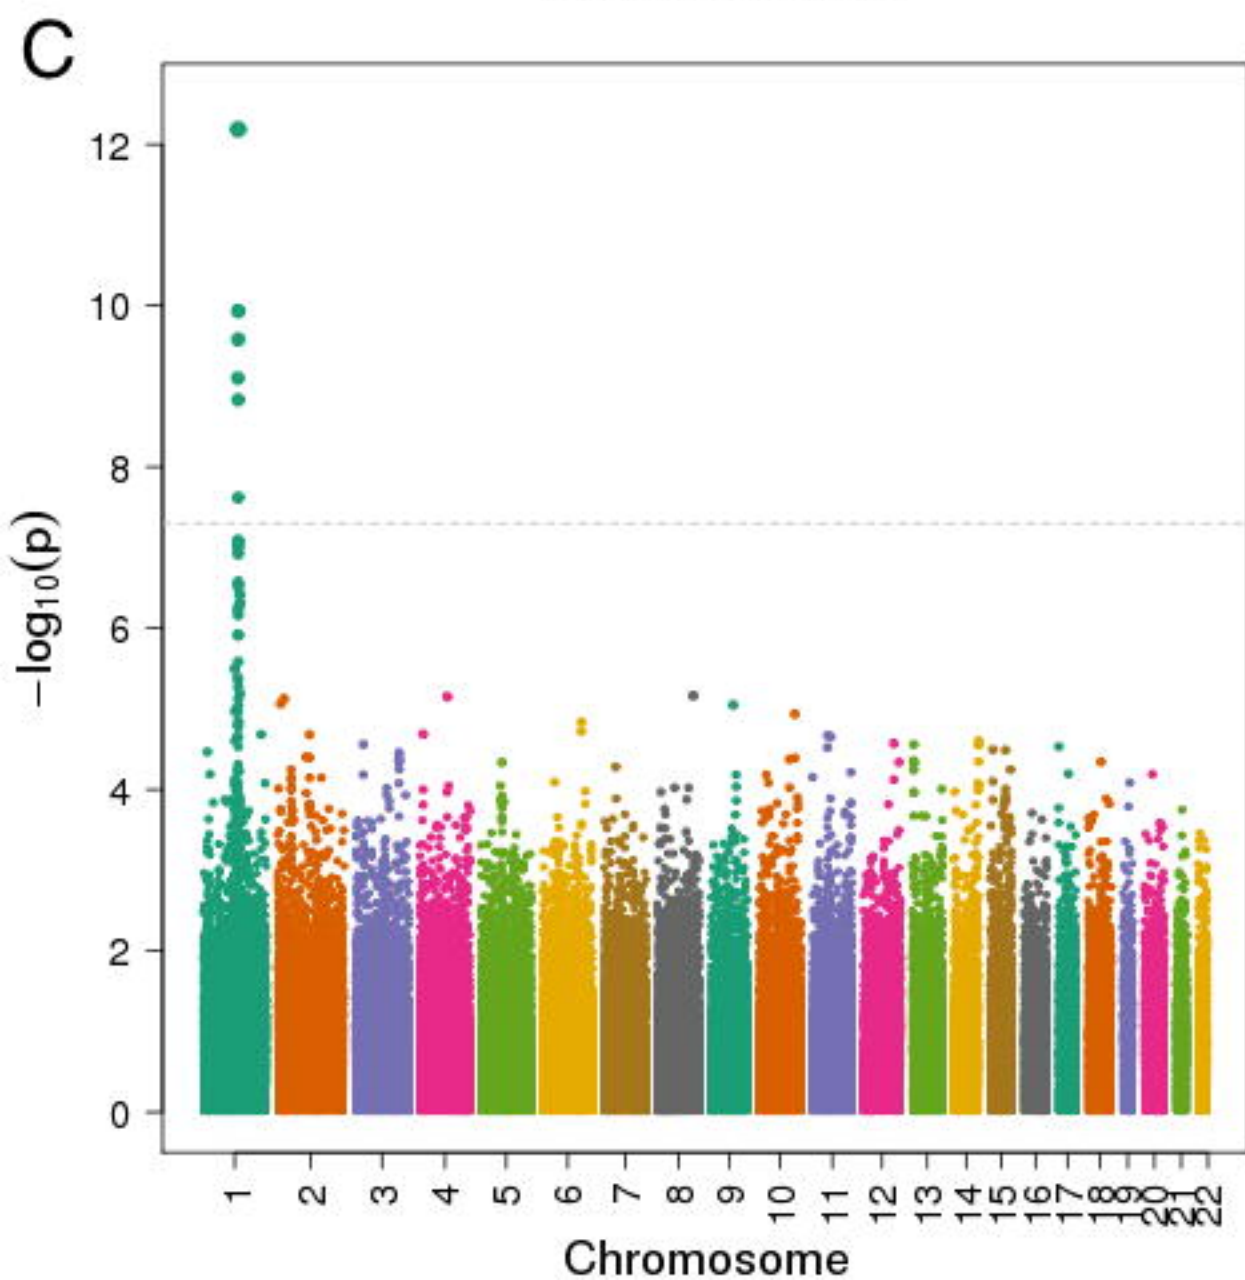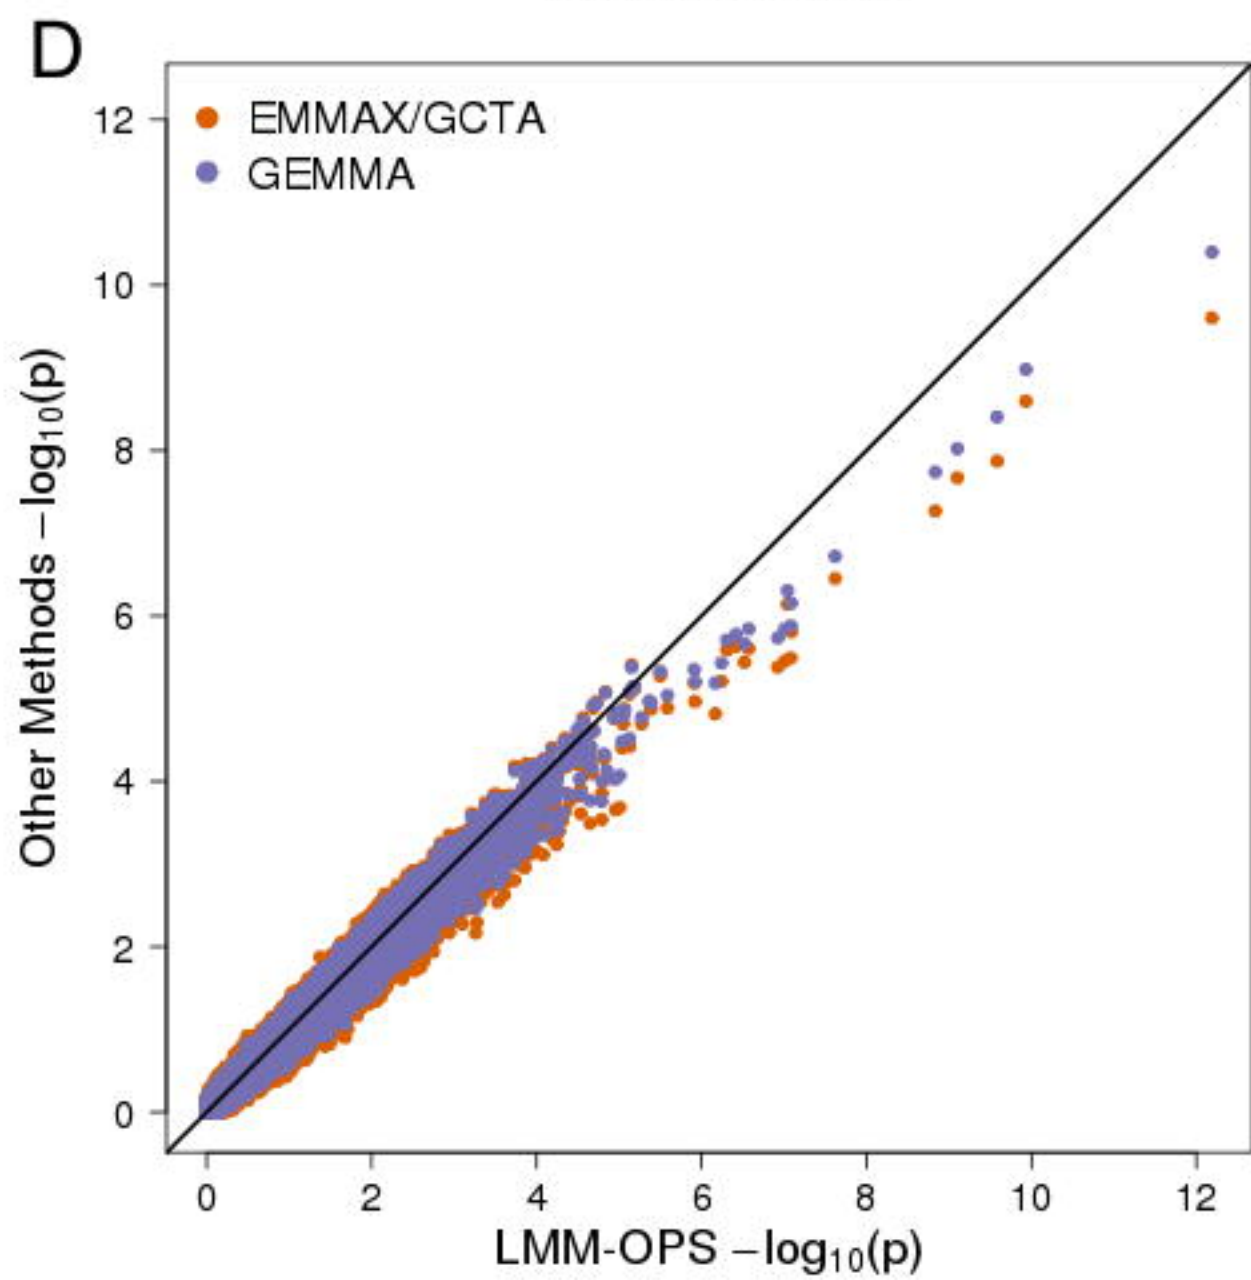

Source: https://www.biorxiv.org/content/10.1101/409953v1.full.pdf
